# Supplementary material for: Expitope 2.0: a tool to assess immunotherapeutic antigens for their potential cross-reactivity against naturally expressed proteins in human tissues
Source: BMC Cancer. 2017 Dec 28;17:892. doi: 10.1186/s12885-017-3854-8 (PMC5745885; doi:10.1186/s12885-017-3854-8)
Supplement: Supplementary file 1 — TableS1_InfectiousDisease. Comma-separated table containing Table S1. (CSV 80 kb) [file 12885_2017_3854_MOESM1_ESM.csv]

Epitope ID	Object Type	Description	Starting Position	Ending Position	Non-peptidic epitope ChEBI ID	Epitope Synonyms	Antigen Name	Antigen ID	Organism Name	Organism ID	Epitope Comments
449	Linear peptide	AASTLLYATV	377	386			FL-160-2 protein - Trypanosoma cruzi	JH0823	Trypanosoma cruzi	5693
716	Linear peptide	ADLMGYIPLV	131	140			polyprotein	BAB18806.1	Hepatitis C virus subtype 1a	31646
1994	Linear peptide	AILHTPGCV	219	227			structural protein	BAA00705.1	Hepatitis C virus subtype 1a	31646
2102	Linear peptide	AITEVECFL	44	52			VP1	BAF93325.1	Human polyomavirus 1	1891762
2244	Linear peptide	AKLVALGINAVAYYR	1405	1419			polyprotein	NP_671491.1	Hepatitis C virus	11103
2387	Linear peptide	ALAHGVRAL	150	158			Genome polyprotein	O39929.3	Hepatitis C virus	11103
2556	Linear peptide	ALGGGATGV	385	393			PE_PGRS 33	AAU10330.1	Mycobacterium tuberculosis	1773
2758	Linear peptide	ALMPLYACI	642	650			DNA polymerase	CAA10434.1	Hepatitis B virus	10407	Imported from the TopBank database.
2860	Linear peptide	ALRGMGLNA	1411	1419			polyprotein	AAU89634.1	Hepatitis C virus	11103
2883	Linear peptide	ALSLAAVLV	7	15			cysteine proteinase cruzipain (EC 3.4.22.-) - Trypanosoma cruzi	A45629	Trypanosoma cruzi	5693
2884	Linear peptide	ALSLAAVLVV	7	16			cysteine proteinase cruzipain (EC 3.4.22.-) - Trypanosoma cruzi	A45629	Trypanosoma cruzi	5693
3017	Linear peptide	ALYDVVSKL	2596	2604			polyprotein	ACE82359.1	Hepatitis C virus subtype 1a	31646
3019	Linear peptide	ALYDVVTKL	2594	2602			Genome polyprotein	P26664.3	Hepatitis C virus subtype 1a	31646
3051	Linear peptide	AMAALQNLPQCSPDEIMAYA	231	250			UL123; IE1	AAR31448.1	Human betaherpesvirus 5	10359
3064	Linear peptide	AMASTEGNV	82	90			6 kDa early secretory antigenic target	P0A564.2	Mycobacterium tuberculosis	1773
4002	Linear peptide	AQLLTEFAI	254	262			PPE family protein	NP_337616.1	Mycobacterium tuberculosis	1773
5213	Linear peptide	ATWAENIQV	862	870			nonstructural protein 5	YP_001527887.1	West Nile virus NY-99	10000971	The author provided GenBank identifier was GI:11597240.
6431	Linear peptide	CINGCVWTV					Genome polyprotein	SRC279960	Hepatitis C virus	11103	This peptide was not found in genbank or Swissprot databases. It is naturally found in the NS3 region of hepatitis C virus.
6433	Linear peptide	CINGVCWTA					Genome polyprotein	SRC279960	Hepatitis C virus subtype 1a	31646
6435	Linear peptide	CINGVCWTV	47	55			NS3	ABN45875.1	Hepatitis C virus	11103
6437	Linear peptide	CINGVWCTV					Genome polyprotein	SRC279960	Hepatitis C virus	11103
6556	Linear peptide	CLFKDWEEL	115	123			X protein	BAG70907.1	Hepatitis B virus	10407	Epitope sequence present in HBV subtypes adr, adw, and ayw.
6568	Linear peptide	CLGGLLTMV	294	302			latent membrane protein 2	AAB59844.1	Human gammaherpesvirus 4	10376
6889	Linear peptide	CQNGACWTS	61	69			Agglutinin isolectin 1 precursor	P10968.2	Triticum aestivum	4565
7291	Linear peptide	CVNGSCFTV	213	221			neuramindase	AAT73327.1	Influenza A virus (A/Puerto Rico/8/1934(H1N1))	211044
7292	Linear peptide	CVNGVCWTV	1073	1081			polyprotein	BAA01943.1	Hepatitis C virus	11103
7447	Linear peptide	CYVLEETSVML	314	324			UL123; IE1	AAR31448.1	Human betaherpesvirus 5	10359
8052	Linear peptide	DELAAKLVALGINAV	1401	1415			polyprotein	NP_671491.1	Hepatitis C virus	11103
9114	Linear peptide	DLIAQPIRLL					Genome polyprotein	SRC279960	Hepatitis C virus subtype 1a	31646
9199	Linear peptide	DLMGYIPAV	16	24			E1 protein	ABB77003.1	Hepatitis C virus	11103	The core protein is part of the HCV polyprotein.
9203	Linear peptide	DLMGYIPLV	132	140			Genome polyprotein	P26664.3	Hepatitis C virus subtype 1a	31646
9414	Linear peptide	DMWEHAFYL	160	168			Superoxide dismutase	P17670.1	Mycobacterium tuberculosis	1773
9415	Linear peptide	DMWEHAFYLQ	160	169			Superoxide dismutase	P17670.1	Mycobacterium tuberculosis	1773
10736	Linear peptide	DVSRPTAVV	162	170			trans-sialidase	XP_814755.1	Trypanosoma cruzi	5693
12941	Linear peptide	ELAGIGILTV
13091	Linear peptide	ELIEANLLW	2225	2233			polyprotein precursor	BAA01582.1	Hepatitis C virus	11103
13165	Linear peptide	ELLRPTTLV	168	176			trans-sialidase, putative	EAN81972.1	Trypanosoma cruzi	5693
14198	Linear peptide	ESLKTFEQVTE	61	71			UL123; IE1	AAR31390.1	Human betaherpesvirus 5	10359
14381	Linear peptide	ETFWAKHMW	1758	1766			polyprotein	BAA25076.1	Hepatitis C virus	11103
14720	Linear peptide	EVIAPAVQTNW	1744	1754			Genome polyprotein	P26664.3	Hepatitis C virus	11103
15226	Linear peptide	FANCNFTLV	570	578			trans-sialidase	XP_810383.1	Trypanosoma cruzi	5693
15230	Linear peptide	FANHDFTLV					Trans-sialidase	SRC7915	Trypanosoma cruzi	5693
15231	Linear peptide	FANHKFTLV	575	583			trans-sialidase, putative	EAN86366.1	Trypanosoma cruzi	5693
15232	Linear peptide	FANHNFTLV	579	587			trans-sialidase	XP_821438.1	Trypanosoma cruzi	5693
15233	Linear peptide	FANNEFTLV	265	273			trans-sialidase, putative	EAN81456.1	Trypanosoma cruzi	5693
15234	Linear peptide	FANNKFTLV	555	563			trans-sialidase	XP_815749.1	Trypanosoma cruzi	5693
15242	Linear peptide	FANYKFTLV	379	387			trans-sialidase, putative	EAN81560.1	Trypanosoma cruzi	5693
15244	Linear peptide	FANYNFTLV	581	589			trans-sialidase	XP_818893.1	Trypanosoma cruzi	5693
16156	Linear peptide	FIAGLIAIV	1202	1210			Spike glycoprotein precursor	P59594.1	SARS coronavirus	227859
16158	Linear peptide	FIAGNSAYEYV	619	629			glycoprotein B	GI:146336957	Human betaherpesvirus 5	10359	The following refers to the epitope id as found in the original FIMM database: P000034
16332	Linear peptide	FIYAGSLSA	183	191			Antigen 85-B precursor (85B) (Extracellular alpha-antigen) (Antigen 85 complex B) (Ag85B) (Mycolyl transferase 85B) (Fibronectin-binding protein B) (30 kDa extracellular protein)	P31952	Mycobacterium tuberculosis	1773
16548	Linear peptide	FLDKGTYTL	276	284			Glycoprotein GP110 precursor	P03188.1	Human herpesvirus 4 (strain B95-8)	10377
16623	Linear peptide	FLGKIWPSYK	432	441			gag protein	AAV53308.1	Human immunodeficiency virus 1	11676
16706	Linear peptide	FLLALLSCL	177	185			structural protein	BAA00705.1	Hepatitis C virus	11103
16725	Linear peptide	FLLLADARV	723	731			Genome polyprotein	P26664.3	Hepatitis C virus subtype 1a	31646
16751	Linear peptide	FLLSLGIHL	572	580			polymerase	BAB82387.1	Hepatitis B virus	10407
16753	Linear peptide	FLLTKILTI	239	247			surface protein	CAB38230.1	Hepatitis B virus	10407
16755	Linear peptide	FLLTRILTI	183	191			HBV surface proteins	CAA54514.1	Hepatitis B virus	10407
16772	Linear peptide	FLMPFMHYIV	29	38			Type IV pili glycosylation protein	YP_169902.1	Francisella tularensis subsp. tularensis SCHU S4	177416
16795	Linear peptide	FLPADFFPSI	47	56			precore/core protein	AAP57273.1	Hepatitis B virus	10407
16796	Linear peptide	FLPADFFPSV	47	56			precore/core protein	AAP94241.1	Hepatitis B virus	10407	Imported from the TopBank database. This is a variable region, as determined from sequencing of viruses from clinical isolates.
16813	Linear peptide	FLPNDFFPSA					External core antigen	SRC279980	Hepatitis B virus	10407
16814	Linear peptide	FLPNDFFPSV	47	56			precore protein	CAM58990.1	Hepatitis B virus	10407	Imported from the TopBank database. This is a variable region, as determined from sequencing of viruses from clinical isolates.
16815	Linear peptide	FLPPDFFPSV	18	27			core protein [Hepatitis B virus]	AAR19324.1	Hepatitis B virus	10407	This epitope is a mutant of the core 18-27 peptide of HBV which was identified in infected patients.
16827	Linear peptide	FLPSDFFPGV					External core antigen	SRC279980	Hepatitis B virus	10407	This epitope is a mutant of the core 18-27 peptide of HBV which was identified in infected patients.
16831	Linear peptide	FLPSDFFPSA					External core antigen	SRC279980	Hepatitis B virus	10407
16832	Linear peptide	FLPSDFFPSI	18	27			core protein	BAF42671.1	Hepatitis B virus	10407
16833	Linear peptide	FLPSDFFPSV	18	27			core protein	CAL29866.1	Hepatitis B virus	10407
16836	Linear peptide	FLPSDFLPSV	47	56			precore/core protein [Hepatitis B virus]	AAR03815.1	Hepatitis B virus	10407	This epitope is a mutant of the core 18-27 peptide of HBV which was identified in infected patients.
16839	Linear peptide	FLPSDTNMGL					External core antigen	SRC279980	Hepatitis B virus	10407	This epitope is a mutant of the core 18-27 peptide of HBV which was identified in infected patients.
16856	Linear peptide	FLPVDFFPSI
16857	Linear peptide	FLPVDFFPSV	47	56			pre-c/core	CAA59565.1	Hepatitis B virus	10407
16889	Linear peptide	FLSHDFTLV	551	559			trans-sialidase, putative	EAN82636.1	Trypanosoma cruzi	5693
16890	Linear peptide	FLSHNFTLV	572	580			trans-sialidase	XP_810777.1	Trypanosoma cruzi	5693
16936	Linear peptide	FLVDAIVRV	289	297			tegument protein VP13/14	NP_044517.1	Human alphaherpesvirus 2	10310
16937	Linear peptide	FLVDAIVRVA	289	298			tegument protein VP13/14	NP_044517.1	Human alphaherpesvirus 2	10310
16979	Linear peptide	FLYALALLL	356	364			membrane protein	AAA45887.1	Human gammaherpesvirus 4	10376
17079	Linear peptide	FMPKVNFEV	277	285			hypothetical protein FTT1095c	YP_170074.1	Francisella tularensis subsp. tularensis SCHU S4	177416
17110	Linear peptide	FMVFLQTHI	562	570			EBNA-1 protein	Q777E1	Human gammaherpesvirus 4	10376
18011	Linear peptide	FTLVAPVSI	534	542			FL-160-2 protein - Trypanosoma cruzi	JH0823	Trypanosoma cruzi	5693
18062	Linear peptide	FTSAVLLLV	6	14			FL-160-2 protein - Trypanosoma cruzi	JH0823	Trypanosoma cruzi	5693
18144	Linear peptide	FVDYNFSLV	550	558			trans-sialidase	XP_804884.1	Trypanosoma cruzi	5693
18145	Linear peptide	FVDYNFTIV	514	522			trypomastigote surface glycoprotein	AAA30259.1	Trypanosoma cruzi	5693
18242	Linear peptide	FVNHRFTLV	32	40			trans-sialidase, putative	EAN80731.1	Trypanosoma cruzi	5693
18250	Linear peptide	FVNYDFALV					Trans-sialidase	SRC7915	Trypanosoma cruzi	5693
18251	Linear peptide	FVNYDFTIV	513	521			trans-sialidase	XP_820181.1	Trypanosoma cruzi	5693
18252	Linear peptide	FVNYNFTLV	564	572			trans-sialidase	XP_814186.1	Trypanosoma cruzi	5693
18284	Linear peptide	FVSCDFTIV					Trans-sialidase	SRC7915	Trypanosoma cruzi	5693
18941	Linear peptide	GDCVQGDWCPISGGL	21	35			transcriptional activator Tax	AAG31572.1	Human T-lymphotropic virus 1	11908
19575	Linear peptide	GFLIAYQPLL	442	451			glycoprotein B precursor	AAB72100.1	Human alphaherpesvirus 2	10310
20354	Linear peptide	GILGFVFTL	58	66			M1 protein	CAA30882.1	Influenza A virus	11320
20355	Linear peptide	GILGFVFTLT	58	67			Matrix protein 1	P03485.1	Influenza A virus (A/Puerto Rico/8/1934(H1N1))	211044
20369	Linear peptide	GILTVSVAV	120	128			HEAT SHOCK PROTEIN HSPX (ALPHA-CRSTALLIN HOMOLOG) (14 kDa ANTIGEN) (HSP16.3)	NP_216547.1	Mycobacterium tuberculosis H37Rv	83332	The epitope sequence is from the cited reference: Caccamo et al. (2009) PLoS One 4: e5528 [PMID: 19436760].
20752	Linear peptide	GLADTVVAC	551	559			tegument protein VP13/14	NP_044517.1	Human alphaherpesvirus 2	10310
20786	Linear peptide	GLCPHCINV	613	621			Non-capsid protein NS-1	P07298.1	Human parvovirus B19	10798
20787	Linear peptide	GLCPHCINVG	613	622			Non-capsid protein NS-1	P07298.1	Human parvovirus B19	10798
20788	Linear peptide	GLCTLVAML	259	267			BMLF1 protein	CAD53409.1	Human gammaherpesvirus 4	10376
20894	Linear peptide	GLGWVGWLL	89	97			polyprotein [Hepatitis C virus]	BAF91806.1	Hepatitis C virus	11103
20988	Linear peptide	GLLGCIITSL	1038	1047			Genome polyprotein	P26662.3	Hepatitis C virus (isolate Japanese)	11116
21000	Linear peptide	GLLHHAPSL	308	316			glutamine synthetase GLNA1 (glutamine synthase) (GS-I)	NP_216736.1	Mycobacterium tuberculosis	1773
21004	Linear peptide	GLLLLGLWGT	990	999			FL-160-2 protein - Trypanosoma cruzi	JH0823	Trypanosoma cruzi	5693
21007	Linear peptide	GLLPFHSTL	233	241			transcriptional activator Tax	AAG31572.1	Human T-lymphotropic virus 1	11908
21013	Linear peptide	GLLPSLLLLL	39	48			trans-sialidase, putative	EAN80935.1	Trypanosoma cruzi	5693
21038	Linear peptide	GLMNNAFEWI	188	197			cysteine proteinase cruzipain (EC 3.4.22.-) - Trypanosoma cruzi	A45629	Trypanosoma cruzi	5693
21041	Linear peptide	GLMWLSYFV	88	96			Membrane glycoprotein	Q692E0	SARS coronavirus TJF	284672
21078	Linear peptide	GLPVEYLQV	45	53			Antigen 85-B precursor	P21160.1	Mycobacterium kansasii	1768
21079	Linear peptide	GLQDCTMLV	2727	2735			polyprotein precursor	BAA01582.1	Hepatitis C virus subtype 1a	31646	Imported from the TopBank database.
21116	Linear peptide	GLSAMSTTDL	99	108			X protein	BAG70907.1	Hepatitis B virus	10407	Epitope sequence present in HBV subtypes adr and ayw.
21137	Linear peptide	GLSPTVWLSA	348	357			Major surface antigen precursor	GI:138798	Hepatitis B virus subtype adw	106821
21139	Linear peptide	GLSPTVWLSV	348	357			Large envelope protein	GI:138799	Hepatitis B virus subtype ayw	10418	The following refers to the epitope id as found in the original FIMM database: P000030
21145	Linear peptide	GLSRYVARL	455	463			polymerase	ACT90735.1	Hepatitis B virus	10407
21199	Linear peptide	GLVILLVLAL	367	376			Circumsporozoite protein precursor	P08677.2	Plasmodium vivax strain Belem	31273
21275	Linear peptide	GMGPSLIGL	198	206			Antigen 85-B precursor (85B) (Extracellular alpha-antigen) (Antigen 85 complex B) (Ag85B) (Mycolyl transferase 85B) (Fibronectin-binding protein B) (30 kDa extracellular protein)	P31952	Mycobacterium tuberculosis	1773
21347	Linear peptide	GMSRIGMEV	317	325			Nucleoprotein	P59595.1	SARS coronavirus	227859
23129	Linear peptide	GVRVLEDGV	154	162			polyprotein	BAB18806.1	Hepatitis C virus subtype 1a	31646
24299	Linear peptide	HLSLRGLFV	52	60			X protein	BAF81690.1	Hepatitis B virus	10407
24302	Linear peptide	HLSLRGLPV	52	60			X protein	AAP06597.1	Hepatitis B virus	10407
24390	Linear peptide	HNNGICWGN	315	323			Major capsid protein L1	P50816.2	Human papillomavirus type 44	10592
25370	Linear peptide	IANYNFTLV					Trans-sialidase	SRC7915	Trypanosoma cruzi	5693	The epitope sequence was presumably derived from the nucleotide sequence of a Trans-sialidase pseudogene.
26579	Linear peptide	IILNGSLLTL	581	590			FL-160-2 protein - Trypanosoma cruzi	JH0823	Trypanosoma cruzi	5693
26954	Linear peptide	ILAGYGAGV	1851	1859			polyprotein precursor	BAA01582.1	Hepatitis C virus	11103
27000	Linear peptide	ILDKKVEKV	570	578			Heat shock protein HSP 90-beta	P08238.4	Homo sapiens	9606
27011	Linear peptide	ILDSFDPLV	2252	2260			polyprotein precursor	BAA01582.1	Hepatitis C virus	11103
27096	Linear peptide	ILHTPGCV	220	227			HCV-1	AAA45676.1	Hepatitis C virus (isolate H)	11108	The following refers to the epitope id as found in the original FIMM database: P000051
27125	Linear peptide	ILKEPVHGV	897	905			gag-pol fusion polyprotein	AAN73817.1	Human immunodeficiency virus 1	11676
27195	Linear peptide	ILLWEIPDV	1267	1275			polyprotein	ABG67747.1	West Nile virus	11082
27217	Linear peptide	ILMWEAVTL	100	108			VP1	AAL37677.1	JC polyomavirus	10632
27241	Linear peptide	ILPDPLKPT	787	795			Spike glycoprotein precursor	P59594.1	SARS coronavirus	227859
27345	Linear peptide	ILSPFLPLL	371	379			Large envelope protein	P03138.3	Hepatitis B virus subtype ayw	10418
27564	Linear peptide	IMSSFEFQV	686	694			organic solvent tolerance protein	YP_169505.1	Francisella tularensis subsp. tularensis SCHU S4	177416
27586	Linear peptide	IMYNYPAML	4	12			ESAT-6-like protein esxH	P0A568.2	Mycobacterium tuberculosis	1773
27983	Linear peptide	IPPSFLQAMRKYSPF	101	115			transcriptional activator Tax	AAG31572.1	Human T-lymphotropic virus 1	11908
28508	Linear peptide	ISGGLCSARLHRHAL	31	45			transcriptional activator Tax	AAG31572.1	Human T-lymphotropic virus 1	11908
29455	Linear peptide	IVSPFIPLL	382	390			Major surface antigen precursor	P03141.3	Hepatitis B virus subtype adw2	10408
31747	Linear peptide	KLAEAIFKL	3054	3062			polyprotein	AGO67248.1	Dengue virus 2	11060
31802	Linear peptide	KLEDENPWL	43	51			large delta antigen	AAG26087.1	Hepatitis delta virus TW2667	10000523
31803	Linear peptide	KLEDLERDL	26	34			large delta antigen	AAG26087.1	Hepatitis delta virus TW2667	10000523
31884	Linear peptide	KLGGYVSFV	125	133			HAD superfamily protein	YP_169641.1	Francisella tularensis subsp. tularensis SCHU S4	177416
31974	Linear peptide	KLLGQINLV	90	98			short chain dehydrogenase	YP_169584.1	Francisella tularensis subsp. tularensis SCHU S4	177416
31997	Linear peptide	KLLPEGYWV	34	42			hypothetical protein FTT0484	YP_169522.1	Francisella tularensis subsp. tularensis SCHU S4	177416
32069	Linear peptide	KLPDDFMGCV	411	420			Spike glycoprotein precursor	P59594.1	SARS coronavirus BJ01	228407
32073	Linear peptide	KLPDLCTEL	13	21			Protein E6	P06463.1	Human papillomavirus type 18	333761
32085	Linear peptide	KLPQLCTEL	18	26			Protein E6	P03126.1	Human papillomavirus type 16	333760
32103	Linear peptide	KLQERLAKL	362	370			60 kDa chaperonin 2	P0A520.2	Mycobacterium tuberculosis	1773
32165	Linear peptide	KLSGLGINAV	1406	1415			polyprotein	AAA86907.1	Hepatitis C virus	11103
32167	Linear peptide	KLSGLGLNAV	1406	1415			polyprotein	BAB18806.1	Hepatitis C virus	11103
32179	Linear peptide	KLSSLGLNAV	1410	1419			polyprotein	ABR27415.1	Hepatitis C virus	11103
32208	Linear peptide	KLVALGINAV	1406	1415			Genome polyprotein	P26664.3	Hepatitis C virus subtype 1a	31646
32209	Linear peptide	KLVALGVNAV	1406	1415			polyprotein precursor	BAA01582.1	Hepatitis C virus	11103
32210	Linear peptide	KLVAMGINAV	1406	1415			polyprotein	AAY82027.1	Hepatitis C virus	11103	The epitope is a natural variant of the sequence KLVALGINAV, which arose in one of the patients studied in the chronic phase of infection, replacing the original sequence as the dominant variant in the viruses isolated at >6 mo after infection.
32213	Linear peptide	KLVANNTRL	239	247			Antigen 85-B	P0C5B9.1	Mycobacterium tuberculosis	1773
32237	Linear peptide	KLVSLGVNAV	1406	1415			polyprotein	ABV46286.2	Hepatitis C virus subtype 1b	31647
32238	Linear peptide	KLVVLGINAV	1406	1415			polyprotein [Hepatitis C virus subtype 1a]	ABV46251.2	Hepatitis C virus	11103
32243	Linear peptide	KLWESPQEI	84	92			C protein	BAB60863.1	Measles virus	11234
32250	Linear peptide	KLYCSYEVA	401	409			FL-160-2 protein - Trypanosoma cruzi	JH0823	Trypanosoma cruzi	5693
32268	Linear peptide	KLYQNPTTYI	205	214			hemagglutinin	AAK38298.1	Influenza A virus (A/Bar-headed Goose/Qinghai/61/05(H5N1))	336238
33749	Linear peptide	KTKSDISSLFGQRIEVK	8	24			nonstructural protein 4B	YP_001527886.1	West Nile virus NY-99	10000971	The author provided GenBank identifier was GI:11597240.
33912	Linear peptide	KTWADEYLCV	480	489			FL-160-2 protein - Trypanosoma cruzi	JH0823	Trypanosoma cruzi	5693
34101	Linear peptide	KVLHKRTLGL	91	100			X protein	ACH95876.1	Hepatitis B virus	10407	Epitope sequence present in HBV subtypes adr, adw, and ayw.
34251	Linear peptide	KVVSLVILA	236	244			FL-160-2 protein - Trypanosoma cruzi	JH0823	Trypanosoma cruzi	5693
34598	Linear peptide	KYSPFRNGYMEPTLG	111	125			transcriptional activator Tax	AAG31572.1	Human T-lymphotropic virus 1	11908
34671	Linear peptide	LAAKLVALGINAVAY	1403	1417			polyprotein	NP_671491.1	Hepatitis C virus	11103
35785	Linear peptide	LFAAFPSFA	21	29			14 kDa antigen	P0A5B7.2	Mycobacterium tuberculosis	1773
35844	Linear peptide	LFGYPVYV	12	19			transcriptional activator Tax	AAG31572.1	Human T-lymphotropic virus 1	11908
36357	Linear peptide	LGYGFVNYI	87	95			ELAV-like protein 4 (Paraneoplastic encephalomyelitis antigen HuD) (Hu-antigen D)	P26378.1	Homo sapiens	9606
36358	Linear peptide	LGYGFVNYV	61	69			ELAV-like protein 1	Q15717.2	Homo sapiens	9606
36724	Linear peptide	LITGRLQSL	978	986			Spike glycoprotein precursor	P59594.1	SARS coronavirus	227859
37097	Linear peptide	LLALLSCLTV	178	187			Genome polyprotein	P26664.3	Hepatitis C virus (isolate 1)	11104
37120	Linear peptide	LLCLIFLLV	251	259			preS1/preS2/S envelope	GI:6063466	Hepatitis B virus subtype ayw	10418
37127	Linear peptide	LLCPAGHAV	1169	1177			HCV-1	AAA45676.1	Hepatitis C virus	11103	Data originally imported from the HLA Ligand Database (http://hlaligand.ouhsc.edu/).
37140	Linear peptide	LLDAHIPQL	3	11			Hypothetical protein esxG (PE family protein)	O53692.1	Mycobacterium tuberculosis	1773
37146	Linear peptide	LLDEGKQSL	28	36			6 kDa early secretory antigenic target	P0A564.2	Mycobacterium tuberculosis	1773
37153	Linear peptide	LLDFVRFMGV	284	293			Nuclear antigen EBNA-3C	Q69140.1	Human gammaherpesvirus 4	10376
37187	Linear peptide	LLDYQGMLPV	260	269			preS1/preS2/S envelope	GI:6063466	Hepatitis B virus subtype ayw	10418
37246	Linear peptide	LLFEEYTNI	307	315			transcriptional activator Tax	AAG31572.1	Human T-lymphotropic virus 1	11908
37251	Linear peptide	LLFGHPVYV
37253	Linear peptide	LLFGYAVYV
37254	Linear peptide	LLFGYPRYV
37255	Linear peptide	LLFGYPVAV
37257	Linear peptide	LLFGYPVYV	11	19			Protein Tax-1	P03409.2	Human T-lymphotropic virus 1	11908	Imported from the TopBank database.
37286	Linear peptide	LLFNILGGWV	1807	1816			polyprotein	BAA25076.1	Hepatitis C virus	11103
37317	Linear peptide	LLGCIITSL	1039	1047			Genome polyprotein	P26662.3	Hepatitis C virus (isolate Japanese)	11116
37347	Linear peptide	LLGLWGLATA	743	752			Sialidase 85-1.1 precursor	P18269.2	Trypanosoma cruzi	5693
37350	Linear peptide	LLGLWGTAAL	1049	1058			trans-sialidase	XP_818394.1	Trypanosoma cruzi	5693
37351	Linear peptide	LLGLWVFAAL	573	582			trans-sialidase, putative	EAN81560.1	Trypanosoma cruzi	5693
37364	Linear peptide	LLGRNSFEV	264	272			P53_HUMAN Cellular tumor antigen p53 (Tumor suppressor p53) (Phosphoprotein p53) (Antigen NY-CO-13)	P04637.2	Homo sapiens	9606
37397	Linear peptide	LLHTDFEQV	276	284			Non-capsid protein NS-1	P07298.1	Human parvovirus B19	10798
37398	Linear peptide	LLHTDFEQVM	276	285			Non-capsid protein NS-1	P07298.1	Human parvovirus B19	10798
37473	Linear peptide	LLLDRLNQL	223	231			Nucleoprotein	P59595.1	SARS coronavirus	227859
37498	Linear peptide	LLLGLWGTAA	992	1001			FL-160-2 protein - Trypanosoma cruzi	JH0823	Trypanosoma cruzi	5693
37507	Linear peptide	LLLIWFRPV	579	587			large T antigen	AAT47414.1	Human polyomavirus 1	1891762
37573	Linear peptide	LLMGTLGIV	82	90			E7 protein	ABL96585.1	Human papillomavirus type 16	333760
37590	Linear peptide	LLMWEAVTV	108	116			VP1	BAF93325.1	Human polyomavirus 1	1891762
37685	Linear peptide	LLPRRGPRL	36	44			Genome polyprotein	P29846.3	Hepatitis C virus (isolate Taiwan)	31645
37700	Linear peptide	LLQDSVDFSL	79	88			vimentin	NP_003371.1	Homo sapiens	9606
37877	Linear peptide	LLTTSGVSA	386	394			cysteine proteinase cruzipain (EC 3.4.22.-) - Trypanosoma cruzi	A45629	Trypanosoma cruzi	5693
37970	Linear peptide	LLYGYPVYV	11	19			tax	AAG48731.1	Human T-lymphotropic virus 2	11909
38052	Linear peptide	LMIIPLINV	542	550			Glycoprotein GP85 precursor	P03231.1	Human herpesvirus 4 (strain B95-8)	10377
38082	Linear peptide	LMNNAFEWI	189	197			cysteine proteinase cruzipain (EC 3.4.22.-) - Trypanosoma cruzi	A45629	Trypanosoma cruzi	5693
38083	Linear peptide	LMNNAFEWIV	189	198			cysteine proteinase cruzipain (EC 3.4.22.-) - Trypanosoma cruzi	A45629	Trypanosoma cruzi	5693
38152	Linear peptide	LMWDNVGLV	424	432			L-aspartate oxidase	YP_170403.1	Francisella tularensis subsp. tularensis SCHU S4	177416
38400	Linear peptide	LPAIVREAI	1680	1688			polyprotein	ABG75765.1	Dengue virus 1	11053
39590	Linear peptide	LSPYYKRYISW	831	841			polyprotein	AAY82030.1	Hepatitis C virus	11103
40262	Linear peptide	LVALLACLTV	8	17			Cytochrome P450 2A7	P20853.1	Homo sapiens	9606	The following refers to the epitope id as found in the original FIMM database: P001345
40264	Linear peptide	LVALLVCLTV	8	17			Cytochrome P450 2A6	P11509.3	Homo sapiens	9606	The following refers to the epitope id as found in the original FIMM database: P001344
40468	Linear peptide	LVMAQLLRI	332	340			structural protein	BAA00705.1	Hepatitis C virus subtype 1a	31646
41898	Linear peptide	MLAAQMFIV	285	293			polyprotein	AAF01178.1	Hepatitis C virus subtype 2a	31649
42094	Linear peptide	MLWGYLQYV	549	557			telomer length regulation protein TEL1	EDV12172.1	Saccharomyces cerevisiae RM11-1a	285006
42897	Linear peptide	MTYAAPLFV	127	135			RNA polymerase beta-subunit	AAA21416.1	Mycobacterium tuberculosis	1773
44802	Linear peptide	NLLVTGFDT	260	268			PE-PGRS family protein	ZP_02552202.1	Mycobacterium tuberculosis	1773
44833	Linear peptide	NLPGCSFSI	168	176			polyprotein	BAA03375.1	Hepatitis C virus subtype 1a	31646
44920	Linear peptide	NLVPMVATV	495	503			tegument protein pp65	YP_002608275.1	Human betaherpesvirus 5	10359
48321	Linear peptide	PLFGYPVYV
49485	Linear peptide	PSQEPMSIYVY	104	114			HCMVUL83	CAA35357.1	Human betaherpesvirus 5	10359
50596	Linear peptide	QEGAMHTAL	536	544			polyprotein	ABG75765.1	Dengue virus 1	11053
51311	Linear peptide	QLDPARDVL	8	16			X protein	ABR68906.1	Hepatitis B virus	10407
51342	Linear peptide	QLFNHTMFI	478	486			myosin-9	NP_002464.1	Homo sapiens	9606
51351	Linear peptide	QLGAFLTNV	178	186			Protein Tax-1	P03409.2	Human T-lymphotropic virus 1	11908	The epitope sequence was cited in Yashiki et al. AIDS Res Hum Retroviruses. 2001 Jul 20;17(11):1047-61[PMID:11485622].
51526	Linear peptide	QLRRHIDLLV	257	266			polyprotein	AAB67037.1	Hepatitis C virus	11103
51604	Linear peptide	QMDYSNGLFV	610	619			FL-160-2 protein - Trypanosoma cruzi	JH0823	Trypanosoma cruzi	5693
54342	Linear peptide	RKEVNSQLSLGDPLFPELAE	41	60			UL123; IE1	AAR31448.1	Human betaherpesvirus 5	10359
54501	Linear peptide	RLDDDGNFQL	78	87			nonstructural protein 2B	YP_001527883.1	West Nile virus NY-99	10000971	The author provided GenBank identifier was GI:11597240.
54587	Linear peptide	RLIGHISTL	345	353			monooxygenase family protein	YP_170175.1	Francisella tularensis subsp. tularensis SCHU S4	177416
54605	Linear peptide	RLIVFPDLGV	2580	2589			polyprotein	ACE82359.1	Hepatitis C virus subtype 1a	31646
54650	Linear peptide	RLLLLGLLLL	3013	3022			polyprotein	AAU89634.1	Hepatitis C virus subtype 2a	31649
54654	Linear peptide	RLLPSLLLLL	873	882			trans-sialidase	XP_816729.1	Trypanosoma cruzi	5693
54664	Linear peptide	RLLSPTTIV	120	128			FL-160-2 protein - Trypanosoma cruzi	JH0823	Trypanosoma cruzi	5693
54680	Linear peptide	RLNEVAKNL	1167	1175			Spike glycoprotein precursor	P59594.1	SARS coronavirus	227859
54690	Linear peptide	RLNQLESKV	227	235			Nucleoprotein	P59595.1	SARS coronavirus	227859
54704	Linear peptide	RLPLVLPAV	163	171			hydrolase	WP_015628351.1	Mycobacterium tuberculosis	1773
54797	Linear peptide	RLTVSGLAWTR	160	170			HCMVUL83	CAA35357.1	Human betaherpesvirus 5	10359
54821	Linear peptide	RLWHYPCTI	58	66			E2 protein	AAM33354.1	Hepatitis C virus subtype 1a	31646
54825	Linear peptide	RLWHYPCTV	616	624			polyprotein	ACE82359.1	Hepatitis C virus subtype 1a	31646
55029	Linear peptide	RNLVPMVATVQ	494	504			HCMVUL83	CAA35357.1	Human betaherpesvirus 5	10359
56343	Linear peptide	RVLEDGVNYA	156	165			structural protein	BAA00705.1	Hepatitis C virus	11103
57364	Linear peptide	SECTTPCSGSW	1966	1976			Genome polyprotein	P26664.3	Hepatitis C virus	11103
57790	Linear peptide	SFHSLHLLF	301	309			transcriptional activator Tax	AAG31572.1	Human T-lymphotropic virus 1	11908
58721	Linear peptide	SITEVECFL	36	44			VP1	AAL37677.1	JC polyomavirus	10632	Sequence of epitope is found in reference Du Pasquier et al. [PMID: 14561528].
58740	Linear peptide	SIVSPFIPLL	370	379			large/middle/small S proteins	AAK97183.1	Hepatitis B virus	10407
59088	Linear peptide	SLFGGMSWI	738	746			polyprotein precursor	NP_041724.2	West Nile virus	11082
59089	Linear peptide	SLFGQRIEV	15	23			nonstructural protein 4B	YP_001527886.1	West Nile virus NY-99	10000971	The author provided GenBank identifier was GI:11597240.
59141	Linear peptide	SLGLVILLVL	365	374			Circumsporozoite protein precursor	P08677.2	Plasmodium vivax strain Belem	31273
59154	Linear peptide	SLHTGFLASL	432	441			polyprotein	AAP55688.1	Hepatitis C virus subtype 2a	31649
59240	Linear peptide	SLLAPGAKQNV	401	411			polyprotein	ADC54549.1	Hepatitis C virus subtype 1a	31646
59336	Linear peptide	SLMAFTAAV	1789	1797			polyprotein precursor	BAA01582.1	Hepatitis C virus subtype 1a	31646	Imported from the TopBank database.
59459	Linear peptide	SLSHYFTLV					Trans-sialidase	SRC7915	Trypanosoma cruzi	5693
59524	Linear peptide	SLTSINVQA	68	76			nonstructural protein 4B	YP_001527886.1	West Nile virus NY-99	10000971	The author provided GenBank identifier was GI:11597240.
59551	Linear peptide	SLVIVTTFV	225	233			Glycoprotein GP85 precursor	P03231.1	Human herpesvirus 4 (strain B95-8)	10377
59561	Linear peptide	SLVNGVVRL	2846	2854			polyprotein precursor	NP_041724.2	West Nile virus	11082
59594	Linear peptide	SLYFGGICV					Phosphate transport system permease protein PstA 1	SRC280197	Mycobacterium tuberculosis	1773
59612	Linear peptide	SLYNTIAVL	77	85			gag protein	ABI20203.1	Human immunodeficiency virus 1	11676
59613	Linear peptide	SLYNTVATL	38	46			Gag protein	Q9INE0	HIV-1 M:B	505185
59627	Linear peptide	SMAGSSAMI	166	174			Antigen 85-B precursor (85B) (Extracellular alpha-antigen) (Antigen 85 complex B) (Ag85B) (Mycolyl transferase 85B) (Fibronectin-binding protein B) (30 kDa extracellular protein)	P31952	Mycobacterium tuberculosis	1773
59722	Linear peptide	SMNATLVQA	47	55			FL-160-2 protein - Trypanosoma cruzi	JH0823	Trypanosoma cruzi	5693
59766	Linear peptide	SMVGNWAKV	363	371			HCV-1	AAA45676.1	Hepatitis C virus (isolate H)	11108	The following refers to the epitope id as found in the original FIMM database: P000054
59767	Linear peptide	SMVGNWAKVL	363	372			polyprotein	BAB18806.1	Hepatitis C virus subtype 1a	31646
61741	Linear peptide	STLPETTVV	141	149			Core protein	Q9QAC5	Hepatitis B virus	10407
62127	Linear peptide	SVFRENLFL	60	68			cysteine proteinase cruzipain (EC 3.4.22.-) - Trypanosoma cruzi	A45629	Trypanosoma cruzi	5693
62139	Linear peptide	SVGGVFTSV	430	438			envelope glycoprotein	AAK62756.1	West Nile virus	11082
62244	Linear peptide	SVMKRRIEEIC	337	347			UL123; IE1	AAR31448.1	Human betaherpesvirus 5	10359
62305	Linear peptide	SVRDRLARL	596	604			EBNA3A nuclear protein	Q8AZJ8	Human gammaherpesvirus 4	10376
62977	Linear peptide	TARHTPVNSW	2819	2828			Genome polyprotein	P26664.3	Hepatitis C virus	11103
63963	Linear peptide	TGSPITYSTY	1287	1296			HCV-1	AAA45676.1	Hepatitis C virus	11103
64320	Linear peptide	TIHDIILECV	29	38			Protein E6	P03126.1	Human papillomavirus type 16	333760
64412	Linear peptide	TIPEALAAV	6	14			PE_PGRS 33	AAU10330.1	Mycobacterium tuberculosis	1773
64710	Linear peptide	TLACFVLAAV	60	69			Membrane glycoprotein	Q692E0	SARS coronavirus TJF	284672
64727	Linear peptide	TLARGFPFV	2351	2359			polyprotein precursor	NP_041724.2	West Nile virus	11082
64763	Linear peptide	TLDYKPLSV	208	216			Early antigen protein D	P03191.1	Human herpesvirus 4 (strain B95-8)	10377
64769	Linear peptide	TLEEFSAKL	4	12			kinetoplastid membrane protein KMP-11	EAN87014.1	Trypanosoma cruzi	5693
64794	Linear peptide	TLFIGSHVV	420	428			Glycoprotein GP85 precursor	P03231.1	Human herpesvirus 4 (strain B95-8)	10377
64818	Linear peptide	TLGIVCPI	86	93			E7	AAD33253.1	Human papillomavirus type 16	333760
64819	Linear peptide	TLGIVCPIC	86	94			E7 protein	ABL96585.1	Human papillomavirus type 16	333760
64821	Linear peptide	TLGQHLPTL	123	131			Protein Tax-1	P03409.2	Human T-lymphotropic virus 1	11908	The epitope sequence was cited in Yashiki et al. AIDS Res Hum Retroviruses. 2001 Jul 20;17(11):1047-61[PMID:11485622].
64948	Linear peptide	TLLYATVEV	380	388			FL-160-2 protein - Trypanosoma cruzi	JH0823	Trypanosoma cruzi	5693
64950	Linear peptide	TLLYVLFEV	914	922			Hexon protein	P04133.3	Human adenovirus 5	28285	This conserved sequence is present in HAdV species A: 31 and C: 1, 2, 5.
64967	Linear peptide	TLNDLETDV	341	349			Circumsporozoite protein precursor	P08677.2	Plasmodium vivax strain Belem	31273
65748	Linear peptide	TPRVTGGGAM	417	426			tegument protein pp65	YP_002608275.1	Human betaherpesvirus 5	10359
65929	Linear peptide	TQRTSKTLKVLTPPIT	80	95			transcriptional activator Tax	AAG31572.1	Human T-lymphotropic virus 1	11908
68461	Linear peptide	VFFNILGGWV	1813	1822			polyprotein	ACZ60108.1	Hepatitis C virus	11103
69398	Linear peptide	VLCLRPVGA	15	23			X protein	AAP06597.1	Hepatitis B virus	10407
69452	Linear peptide	VLEETSVML	316	324			UL123; IE1	AAR31448.1	Human betaherpesvirus 5	10359
69500	Linear peptide	VLGGCRHKL	133	141			X protein	BAG70907.1	Hepatitis B virus	10407	Epitope sequence present in HBV subtypes adr, adw, and ayw.
69524	Linear peptide	VLHKRTLGL	92	100			X protein	ACH95876.1	Hepatitis B virus	10407	Epitope sequence present in HBV subtypes adr, adw, and ayw.
69646	Linear peptide	VLMGGVPGVE	158	167			Alanine dehydrogenase	P30234.2	Mycobacterium tuberculosis	1773
69649	Linear peptide	VLMIKALEL	741	749			myosin-9	NP_002464.1	Homo sapiens	9606
69661	Linear peptide	VLNETTNWL	2900	2908			polyprotein precursor	NP_041724.2	West Nile virus	11082
69671	Linear peptide	VLNPYMPSV	2673	2681			polyprotein	AGO67248.1	Dengue virus 2	11060
69719	Linear peptide	VLQELNVTV	169	177			proteinase 3	AAH96184.1	Homo sapiens	9606
69731	Linear peptide	VLQWASLAV	863	871			Major outer envelope glycoprotein gp350	Q66537	Human gammaherpesvirus 4	10376
69751	Linear peptide	VLSDFKTWL	1989	1997			polyprotein	ACE82359.1	Hepatitis C virus subtype 1a	31646
69798	Linear peptide	VLTDGNPPEV	88	97			lipoprotein	NP_338420.1	Mycobacterium tuberculosis	1773
69907	Linear peptide	VLYSPNVSV	239	247			envelope	BAK20487.1	Human T-lymphotropic virus 1	11908	The epitope sequence was cited in Yashiki et al. AIDS Res Hum Retroviruses. 2001 Jul 20;17(11):1047-61[PMID:11485622].
69913	Linear peptide	VMACLVPAA	16	24			cysteine proteinase cruzipain (EC 3.4.22.-) - Trypanosoma cruzi	A45629	Trypanosoma cruzi	5693
69980	Linear peptide	VMLAAQMFIV	284	293			polyprotein	AAF01178.1	Hepatitis C virus subtype 2a	31649
69996	Linear peptide	VMMSCSSEA	16	24			FL-160-2 protein - Trypanosoma cruzi	JH0823	Trypanosoma cruzi	5693
71409	Linear peptide	VTLPTGQCL	378	386			cysteine proteinase cruzipain (EC 3.4.22.-) - Trypanosoma cruzi	A45629	Trypanosoma cruzi	5693
71616	Linear peptide	VVCMYLYQLSPPITW	151	165			transcriptional activator Tax	AAG31572.1	Human T-lymphotropic virus 1	11908
71657	Linear peptide	VVFDITKWLL	888	897			polyprotein	AAF01178.1	Hepatitis C virus subtype 2a	31649
71663	Linear peptide	VVFLHVTYV	1042	1050			Spike glycoprotein precursor	P59594.1	SARS coronavirus	227859
71734	Linear peptide	VVLDSLDPMV	2251	2260			polyprotein	AAF01178.1	Hepatitis C virus subtype 2a	31649
71756	Linear peptide	VVMACLVPAA	15	24			cysteine proteinase cruzipain (EC 3.4.22.-) - Trypanosoma cruzi	A45629	Trypanosoma cruzi	5693
72621	Linear peptide	WIIKNSWTA	300	308			cysteine proteinase cruzipain (EC 3.4.22.-) - Trypanosoma cruzi	A45629	Trypanosoma cruzi	5693
72721	Linear peptide	WLGNHGFEV	110	118			hypothetical protein FTT0869	YP_169869.1	Francisella tularensis subsp. tularensis SCHU S4	177416
72722	Linear peptide	WLGNIIQYA	2850	2858			polyprotein	AAF01178.1	Hepatitis C virus subtype 2a	31649
72790	Linear peptide	WLSDCGEAL	457	465			FL-160-2 protein - Trypanosoma cruzi	JH0823	Trypanosoma cruzi	5693
72794	Linear peptide	WLSLLVPFV	335	343			envelope protein	BAF48755.1	Hepatitis B virus	10407
74288	Linear peptide	YILDLQPETT	11	20			Protein E7	P36831.1	Human papillomavirus type 52	10618
74407	Linear peptide	YIVRWEWVV	717	725			polyprotein	AAU89634.1	Hepatitis C virus subtype 2a	31649
74545	Linear peptide	YLAAYALVGL	3	12			TcP2beta	CAA52943.1	Trypanosoma cruzi	5693
74605	Linear peptide	YLDKVRATV	301	309			Circumsporozoite protein precursor	P08677.2	Plasmodium vivax strain Belem	31273
74768	Linear peptide	YLLDGLRAQ	77	85			Antigen 85-B precursor (85B) (Extracellular alpha-antigen) (Antigen 85 complex B) (Ag85B) (Mycolyl transferase 85B) (Fibronectin-binding protein B) (30 kDa extracellular protein)	P31952	Mycobacterium tuberculosis	1773
74774	Linear peptide	YLLEMLWRL	125	133			LMP1 protein (Epstein-Barr virus, putative LYDMA gene)	Q777A4	Human gammaherpesvirus 4	10376
74798	Linear peptide	YLLPRRGPRL	35	44			Genome polyprotein	P29846.3	Hepatitis C virus	11103
74800	Linear peptide	YLLPSRGPKL					Genome polyprotein	SRC279960	Hepatitis C virus subtype 2b	31650
74886	Linear peptide	YLQQNWWTL	159	167			latent membrane protein 1	AAS99606.1	Human gammaherpesvirus 4	10376
74988	Linear peptide	YLVTRHADV	1131	1139			polyprotein	BAB18806.1	Hepatitis C virus	11103
75024	Linear peptide	YLYQLSPPI	155	163			Protein Tax-1	P03409.2	Human T-lymphotropic virus 1	11908	The epitope sequence was cited in Yashiki et al. AIDS Res Hum Retroviruses. 2001 Jul 20;17(11):1047-61[PMID:11485622].
75074	Linear peptide	YMLDLQPET	11	19			Protein E7	P03129.1	Human papillomavirus type 16	333760
75075	Linear peptide	YMLDLQPETT	11	20			E7 protein	ABL96585.1	Human papillomavirus type 16	333760
76121	Linear peptide	YTMDGEYRL	518	526			nonstructural protein 3	YP_001527884.1	West Nile virus NY-99	10000971	The author provided GenBank identifier was GI:11597240.
76277	Linear peptide	YVGDLCGCV					Genome polyprotein	SRC279960	Hepatitis C virus	11103
76333	Linear peptide	YVLDHLIVV	109	117			BRLF1	ABB89247.1	Human gammaherpesvirus 4	10376
76334	Linear peptide	YVLDLQPEAT	11	20			Protein E7	P17387.1	Human papillomavirus type 31	10585
78346	Linear peptide	AFLGERVTL	23	31			BARF1 protein	CAD53469.1	Human gammaherpesvirus 4	10376
78382	Linear peptide	FLGERVTLT	24	32			BARF1 protein	CAD53469.1	Human gammaherpesvirus 4	10376
78432	Linear peptide	KLGPGEEQV	50	58			BARF1 protein	CAD53469.1	Human gammaherpesvirus 4	10376
78501	Linear peptide	RFIAQLLLL	3	11			BARF1 protein	CAD53469.1	Human gammaherpesvirus 4	10376
78534	Linear peptide	TLTSYWRRV	30	38			BARF1 protein	CAD53469.1	Human gammaherpesvirus 4	10376
88377	Linear peptide	SAPLPSNRV	472	480			IE62	AAP32859.1	Human alphaherpesvirus 3	10335
88849	Linear peptide	SLPRSRTPI	445	453			IE62	AAP32859.1	Human alphaherpesvirus 3	10335
92301	Linear peptide	AIYDTMQYV	88	96			ATP-dependent Clp protease proteolytic subunit	NP_216976.1	Mycobacterium tuberculosis H37Rv	83332
92817	Linear peptide	GLAGGAATA	30	38			secreted antigen 85-B fbpB (85B) (antigen 85 complex B) (Mycolyl transferase 85B) (fibronectin-binding protein B) (extracellular alpha-antigen)	NP_216402.1	Mycobacterium tuberculosis H37Rv	83332
93270	Linear peptide	LLYDGSFAV	42	50			hypothetical protein	NP_218356.1	Mycobacterium tuberculosis H37Rv	83332
95278	Linear peptide	CINGVCWSI	47	55			polyprotein	BAC67110.1	Hepatitis C virus	11103
95279	Linear peptide	CINGVCWSV	1073	1081			polyprotein	BAG31965.1	Hepatitis C virus	11103
97338	Linear peptide	GIDPNIRTGV	112	121			polyprotein	ABQ95864.1	Hepatitis C virus subtype 1a	31646
97373	Linear peptide	GVDPNIRTGV	1275	1284			polyprotein	ACE82359.1	Hepatitis C virus subtype 1a	31646
98039	Linear peptide	FLSHNFTLVF					Trans-sialidase	SRC7915	Trypanosoma cruzi	5693	The epitope sequence was presumably derived from the nucleotide sequence of a Trans-sialidase pseudogene.
98466	Linear peptide	SLSHYFTLVF					Trans-sialidase	SRC7915	Trypanosoma cruzi	5693	The epitope sequence was presumably derived from the nucleotide sequence of a Trans-sialidase pseudogene.
108770	Linear peptide	ALQAIELQL	69	77			E2 protein	ACS92695.1	Human papillomavirus type 16	333760	The epitope sequence was found in the cited reference, Konya et al, J Gen Virol: 78(10) 1997 [PMID 9349483].
108957	Linear peptide	FLLGLLFFV	325	333			hypothetical protein	NP_216006.1	Mycobacterium tuberculosis	1773
108965	Linear peptide	FLYELIWNV	197	205			Prolipoprotein diacylglyceryl transferase	O06131.1	Mycobacterium tuberculosis	1773
109984	Linear peptide	TLQDVSLEV	93	101			E2 protein	ACS92695.1	Human papillomavirus type 16	333760	The epitope sequence was found in the cited reference, Konya et al, J Gen Virol: 78(10) 1997 [PMID 9349483].
110125	Linear peptide	YICEEASVTV	138	147			E2 protein	ACS92695.1	Human papillomavirus type 16	333760	The epitope sequence was found in the cited reference, Konya et al, J Gen Virol: 78(10) 1997 [PMID 9349483].
110225	Linear peptide	FQQLFLNTL	86	94			Protein E7	P06788.2	Human papillomavirus type 18	333761
110323	Linear peptide	LLLGTLNIV	82	90			Protein E7	P04020.1	Human papillomavirus type 11	10580
110439	Linear peptide	TLLQQYCLYL	253	262			Replication protein E1	P03114.2	Human papillomavirus type 16	333760	The epitope sequence was found in the cited reference, Konya et al, J Gen Virol: 78(10) 1997 [PMID 9349483].
110744	Linear peptide	YIIFVYIPL	63	71			E5 protein	AAD24036.1	Human papillomavirus type 16	333760
110917	Linear peptide	KLVCSPAPC	140	148			X protein	AAP06597.1	Hepatitis B virus	10407
111479	Linear peptide	LFLNTLSFV	89	97			Protein E7	P06788.2	Human papillomavirus type 18	333761
115656	Linear peptide	TLDTKPLSV					DNA polymerase processivity factor BMRF1	SRC280248	Human gammaherpesvirus 4	10376
126028	Linear peptide	FMYEGDTPL	862	870			ATP-dependent helicase	NP_217813.1	Mycobacterium tuberculosis H37Rv	83332
126481	Linear peptide	KSLFNTIATLY	76	86			gag polyprotein p17 region	BAA83653.1	Human immunodeficiency virus 1	11676
126482	Linear peptide	KSLFNTIAVL	76	85			gag protein	AAY98604.1	Human immunodeficiency virus 1	11676
126483	Linear peptide	KSLFNTIAVLY	76	86			gag protein	AAY98604.1	Human immunodeficiency virus 1	11676
126484	Linear peptide	KSLFNTVATL	76	85			gag protein	AAW03034.1	Human immunodeficiency virus 1	11676
126485	Linear peptide	KSLFNTVATLY	76	86			gag protein	AAW03034.1	Human immunodeficiency virus 1	11676
126486	Linear peptide	KSLFNTVAVL	76	85			gag protein	ADK33372.1	Human immunodeficiency virus 1	11676
126487	Linear peptide	KSLFNTVAVLY	76	86			gag protein	ADK33372.1	Human immunodeficiency virus 1	11676
126488	Linear peptide	KSLYNTIATLY	76	86			gag protein	AAV53168.1	Human immunodeficiency virus 1	11676
126489	Linear peptide	KSLYNTIAVLY	76	86			gag protein	ABI20203.1	Human immunodeficiency virus 1	11676
126490	Linear peptide	KSLYNTVATL	76	85			Gag protein	Q1KW74	Human immunodeficiency virus 1	11676
126491	Linear peptide	KSLYNTVATLY	76	86			gag protein	AAV53216.1	Human immunodeficiency virus 1	11676
126492	Linear peptide	KSLYNTVAVLY	76	86			gag protein	BAB88077.1	Human immunodeficiency virus 1	11676
126993	Linear peptide	RSLFNTIATLY	76	86			gag polyprotein	BAB19174.1	Human immunodeficiency virus 1	11676
126994	Linear peptide	RSLFNTIAVLY	76	86			gag-pol polyprotein	BAC02551.1	Human immunodeficiency virus 1	11676
126995	Linear peptide	RSLFNTVATL	76	85			gag polyprotein	BAB19171.1	Human immunodeficiency virus 1	11676
126996	Linear peptide	RSLFNTVATLY	49	59			Gag protein	Q9YYH6	Human immunodeficiency virus 1	11676
126997	Linear peptide	RSLFNTVAVLY	76	86			gag protein	BAC45024.1	Human immunodeficiency virus 1	11676
126999	Linear peptide	RSLYNTIATLY	76	86			gag polyprotein	BAB88540.1	Human immunodeficiency virus 1	11676
127000	Linear peptide	RSLYNTIAVLY	76	86			gag-pol fusion polyprotein precursor	CAY83124.1	Human immunodeficiency virus 1	11676
127001	Linear peptide	RSLYNTVATL	76	85			gag polyprotein	BAA00992.1	Human immunodeficiency virus 1	11676
127002	Linear peptide	RSLYNTVATLY	76	86			gag protein	AAV53342.1	Human immunodeficiency virus 1	11676
127003	Linear peptide	RSLYNTVAVL	76	85			gag polyprotein	BAB88551.1	Human immunodeficiency virus 1	11676
127004	Linear peptide	RSLYNTVAVLY	76	86			gag polyprotein	BAB88551.1	Human immunodeficiency virus 1	11676
127082	Linear peptide	SLFNTIAVLY	77	86			gag-pol polyprotein	BAC02551.1	Human immunodeficiency virus 1	11676
127083	Linear peptide	SLFNTVATLY	50	59			Gag protein	Q9YYH6	Human immunodeficiency virus 1	11676
130542	Linear peptide	LLFGKPVYV + SCM(K5)									The epitope is an analog of the Tax 11-19 peptide (LLFGYPVYV) with a Y5K substitution at position 5. This lysine was conjugated to indolyl-butyric acid (Tax-5K-4-(3-Indolyl)-butyric acid).
131070	Linear peptide	SLFNTVATL	38	46			Gag protein	Q9IN85	HIV-1 M:A	505184
131311	Linear peptide	SLMSWSAIL	78	86			interferon-inducible peptide precursor	AAC50160.1	Homo sapiens	9606
133501	Linear peptide	AIVREAIKR	1682	1690			polyprotein	ABG75765.1	Dengue virus 1	11053
133619	Linear peptide	KLIVTPAAL	305	313			putative surface protein	AAN52495.1	Leptospira interrogans serovar Pomona	44276
133702	Linear peptide	SRNSTHEMY	2703	2711			polyprotein	ABG75765.1	Dengue virus 1	11053
133716	Linear peptide	TLYAVATTI	2284	2292			polyprotein	ABG75765.1	Dengue virus 1	11053
135263	Linear peptide	RLYQNPTTYI	204	213			hemagglutinin	ACX31970.1	Influenza A virus (A/Bar-headed Goose/Qinghai/61/05(H5N1))	336238
136837	Linear peptide	FLLALLSCLTV	177	187			polyprotein precursor	BAA01582.1	Hepatitis C virus	11103
139746	Linear peptide	FLVPFVVFL	25	33			Dense granule protein 3	B6KEU8.2	Toxoplasma gondii	5811
139747	Linear peptide	FMGVLVNSL	29	37			granule antigen protein GRA6	XP_002371939.1	Toxoplasma gondii ME49	508771
139947	Linear peptide	VVFVVFMGV	24	32			granule antigen protein GRA6	XP_002371939.1	Toxoplasma gondii ME49	508771
140541	Linear peptide	ALDEGLLPV	347	355			hypothetical protein	NP_218210.1	Mycobacterium tuberculosis H37Rv	83332
140542	Linear peptide	ALLGGLRPV	144	152			MCE-family protein MCE4B	NP_218015.1	Mycobacterium tuberculosis H37Rv	83332
140543	Linear peptide	AMAGSIDLL	1237	1245			trehalose-6-phosphate phosphatase OtsB1	YP_177855.1	Mycobacterium tuberculosis H37Rv	83332
140561	Linear peptide	GMFANRWII	836	844			metal cation transporter P-type ATPase A CtpF	NP_216513.1	Mycobacterium tuberculosis H37Rv	83332
140564	Linear peptide	HLDDVGFLV	110	118			esterase lipoprotein LpqC	NP_217815.1	Mycobacterium tuberculosis H37Rv	83332
140597	Linear peptide	SLIDLLHKI	147	155			MCE-family protein MCE4A	YP_177977.1	Mycobacterium tuberculosis H37Rv	83332
140599	Linear peptide	SLRNWIATL	99	107			MCE-family lipoprotein LprL	NP_215107.1	Mycobacterium tuberculosis H37Rv	83332
140600	Linear peptide	SLWKDGAPL	280	288			glutamine synthetase GLNA1 (glutamine synthase) (GS-I)	NP_216736.1	Mycobacterium tuberculosis H37Rv	83332
140615	Linear peptide	WLYPGAQNL	71	79			amino acid decarboxylase	YP_177889.1	Mycobacterium tuberculosis H37Rv	83332
140616	Linear peptide	YLLADTFTV	166	174			membrane-associated phospholipase C	NP_216866.1	Mycobacterium tuberculosis H37Rv	83332
140650	Linear peptide	AMLGHAGDM	10	18			ESAT-6-like protein esxH	P0A568.2	Mycobacterium tuberculosis	1773
140711	Linear peptide	MLGHAGDMA	11	19			ESAT-6-like protein esxH	P0A568.2	Mycobacterium tuberculosis	1773
140712	Linear peptide	MMARDTAEA	83	91			LOW MOLECULAR WEIGHT PROTEIN ANTIGEN 7 ESXH (10 kDa ANTIGEN) (CFP-7) (PROTEIN TB10.4)	CAA17363.1	Mycobacterium tuberculosis H37Rv	83332
140727	Linear peptide	QAMEDLVRA	60	68			LOW MOLECULAR WEIGHT PROTEIN ANTIGEN 7 ESXH (10 kDa ANTIGEN) (CFP-7) (PROTEIN TB10.4)	CAA17363.1	Mycobacterium tuberculosis H37Rv	83332
140744	Linear peptide	SQIMYNYPA	2	10			LOW MOLECULAR WEIGHT PROTEIN ANTIGEN 7 ESXH (10 kDa ANTIGEN) (CFP-7) (PROTEIN TB10.4)	CAA17363.1	Mycobacterium tuberculosis H37Rv	83332
141212	Linear peptide	ALLDRDCRV	374	382			tegument protein VP13/14	NP_044649.1	Human alphaherpesvirus 1	10298
141269	Linear peptide	FLADAVVRL	286	294			tegument protein VP13/14	NP_044649.1	Human alphaherpesvirus 1	10298
141270	Linear peptide	FLIAYQPLL	448	456			envelope glycoprotein B	NP_044629.1	Human alphaherpesvirus 1	10298
141271	Linear peptide	FLWEDQTLL	367	375			DNA packaging tegument protein UL25	NP_044626.1	Human alphaherpesvirus 1	10298
141313	Linear peptide	ILIEGIFFA	184	192			ribonucleotide reductase subunit 2	NP_044642.1	Human alphaherpesvirus 1	10298
141396	Linear peptide	RILGVLVHL	425	433			ribonucleotide reductase subunit 1	NP_044641.1	Human alphaherpesvirus 1	10298
141398	Linear peptide	RLLGFADTV	545	553			tegument protein VP13/14	NP_044649.1	Human alphaherpesvirus 1	10298
141399	Linear peptide	RLNELLAYV	220	228			Tegument protein UL46	P10230.2	Herpes simplex virus (type 1 / strain 17)	10299
141423	Linear peptide	SVYPYDEFV	280	288			envelope glycoprotein B	NP_044629.1	Human alphaherpesvirus 1	10298
141430	Linear peptide	TLLELVVSV	389	397			tegument serine/threonine protein kinase	NP_044614.1	Human alphaherpesvirus 1	10298
143666	Linear peptide	ALFHEVAKL	94	102			polyprotein	ACF60462.1	Hepatovirus A	12092	Similar results were observed when T cells were expanded in vitro with a pool of 13 peptides from the polyprotein of HAV, including the epitope.
143726	Linear peptide	LLYNCCYHV	2025	2033			polyprotein	CAC14074.3	Hepatovirus A	12092	Similar results were observed when T cells were expanded in vitro with a pool of 13 peptides from the polyprotein of HAV, including the epitope.
143732	Linear peptide	MMFGFHHSV	1000	1008			polyprotein	CAC14074.3	Hepatovirus A	12092	Similar results were observed when T cells were expanded in vitro with a pool of 13 peptides from the polyprotein of HAV, including the epitope.
143740	Linear peptide	QMMRNEFRV	243	251			polyprotein	ACF60462.1	Hepatovirus A	12092	Similar results were observed when T cells were expanded in vitro with a pool of 13 peptides from the polyprotein of HAV, including the epitope.
143752	Linear peptide	SLMDLLSSL	1394	1402			Genome polyprotein	P06441.1	Hepatovirus A	12092	Similar results were observed when T cells were expanded in vitro with a pool of 13 peptides from the polyprotein of HAV, including the epitope.
145860	Linear peptide	KVLIRCYLC	99	107			Protein E6	P04019.1	Human papillomavirus type 11	10580
145918	Linear peptide	NLLIRCLRC	100	108			Protein E6	P06463.1	Human papillomavirus type 18	333761
146005	Linear peptide	SIDQLCKTF	12	20			Protein E6	P04019.1	Human papillomavirus type 11	10580
146028	Linear peptide	TIDQLCKTF	12	20			E6 protein	NP_040296.1	Human papillomavirus type 6b	10600
146528	Linear peptide	RLGPVQNEI	601	609			NS3/4A protein	CAM56207.1	Hepatitis C virus	11103
150373	Linear peptide	LLILCVTQV	2416	2424			polyprotein	AAA42942.1	Dengue virus 2	11060
150377	Linear peptide	LLLVAHYAI	2355	2363			polyprotein	AGS49173.1	Dengue virus 2	11060
150387	Linear peptide	LMGLGKGWPL	2318	2327			polyprotein	AGO67248.1	Dengue virus 2	11060
150425	Linear peptide	LVISGLFPV	1449	1457			polyprotein	AGS49173.1	Dengue virus 2	11060
150445	Linear peptide	MLLILCVTQV	2415	2424			polyprotein	AGO67248.1	Dengue virus 2	11060
150571	Linear peptide	SLLFKTEDGV	136	145			polyprotein	AGO67248.1	Dengue virus 2	11060
150634	Linear peptide	TLMAMDLGEL	149	158			polyprotein	AGS49173.1	Dengue virus 2	11060
150752	Linear peptide	YVVIAILTV	2229	2237			polyprotein	AGO67249.1	Dengue virus 2	11060
150753	Linear peptide	YVVIAILTVV	2229	2238			polyprotein	AGO67248.1	Dengue virus 2	11060
155927	Linear peptide	TLLTIDGGI	210	218			unnamed protein product	CAA30115.1	Trypanosoma cruzi	5693
155928	Linear peptide	TLQPVERVL	316	324			unnamed protein product	CAA30115.1	Trypanosoma cruzi	5693
158766	Linear peptide	FLTEAIVHSV	1004	1013			RNA-dependent RNA polymerase	AAA84898.1	Human respiratory syncytial virus	11250
159112	Linear peptide	SLQQEITLL	39	47			nucleoprotein	ACJ70112.1	Human metapneumovirus	162145
161353	Linear peptide	IMILLVLVSA	95	104			arsenic-transport integral membrane protein ArsA	NP_217200.1	Mycobacterium tuberculosis H37Rv	83332	Peptide purified from sHLA-A*0201 that was secreted from a Mtb-infected cell.
161402	Linear peptide	LILATMLVA	99	107			hypothetical protein	NP_215301.1	Mycobacterium tuberculosis H37Rv	83332	Peptide purified from sHLA-A*0201 that was secreted from a Mtb-infected cell. Both the oxidized and non-oxidized forms were found in the peptides from the infected cells.
164233	Linear peptide	FVVPILLKA	129	137			nucleocapsid protein	AAA43837.1	Hantaan hantavirus	11599
164417	Linear peptide	VPILLKALY	131	139			nucleocapsid protein	AAA43837.1	Hantaan hantavirus	11599
164547	Linear peptide	RMLGDVMAV	562	570			Glycoprotein B	P10211.1	Herpes simplex virus (type 1 / strain 17)	10299
164551	Linear peptide	TMLEDHEFV	676	684			envelope glycoprotein B	NP_044629.1	Herpes simplex virus (type 1 / strain 17)	10299
168240	Linear peptide	AVPEVTDVTL	19	28			major paraflagellar rod protein	AAA30221.1	Trypanosoma cruzi	5693
168327	Linear peptide	DIIEQMKGV	481	489			paraflagellar rod component	AAC32021.1	Trypanosoma cruzi	5693
168607	Linear peptide	FVSCCGELTV	432	441			paraflagellar rod component	AAC32021.1	Trypanosoma cruzi	5693
168728	Linear peptide	GVSGVINAL	488	496			paraflagellar rod component	AAC32021.1	Trypanosoma cruzi	5693
168988	Linear peptide	KLEKIEDEL	156	164			major paraflagellar rod protein	AAA30221.1	Trypanosoma cruzi	5693
169658	Linear peptide	RLYKTLGQL	449	457			major paraflagellar rod protein	AAA30221.1	Trypanosoma cruzi	5693
180168	Linear peptide	SLFNAVATL	77	85			gag protein	ABO14878.1	Human immunodeficiency virus 1	11676
180191	Linear peptide	SLFNTIATL	77	85			gag polyprotein	BAB19174.1	Human immunodeficiency virus 1	11676
180233	Linear peptide	SLFNTVATV	60	68			gag protein	ACZ34075.1	Human immunodeficiency virus 1	11676
180236	Linear peptide	SLFNTVAVL	77	85			gag	BAC81459.1	Human immunodeficiency virus 1	11676
180255	Linear peptide	SLFNTVVTL	77	85			gag protein	AAT90688.1	Human immunodeficiency virus 1	11676
181036	Linear peptide	VLSDFKVWLKKSMMAFSAAL									The epitope comprises two HCV epitopes, NS5A (1991&ndash;1999) VLSDFKVWL and NS4B (1793&ndash;1801) SMMAFSAAL.
184065	Linear peptide	KLNDWDFVV	399	407			Nonstructural protein NS3	YP_001531172.2	Dengue virus 3	11069
184429	Linear peptide	LLFGFPVYV
185710	Linear peptide	SMINGVVKL	318	326			Nonstructural protein NS5	YP_001531176.2	Dengue virus 3	11069
186689	Linear peptide	LLFGFAVYV + SCM(F5)									Position Y5 of the natural sequence is substituted with a 3,4-difluoro-phenylalanine residue.
186690	Linear peptide	LLFGFPVFV + SCM(F5)									Position Y5 of the natural sequence is substituted with a 3,4-difluoro-phenylalanine residue.
186691	Linear peptide	LLFGFPVYV + SCM(F5)									Position Y5 of the natural sequence is substituted with a 3,4-difluoro-phenylalanine residue.
186692	Linear peptide	LLFGYPVFV
187197	Linear peptide	VCWGELMNL	60	68			Core protein	Q9QAC5	Hepatitis B virus	10407
189204	Linear peptide	ALYNTVATL
189275	Linear peptide	SLFNAVAVL	47	55			gag protein	AAO84847.1	Human immunodeficiency virus 1	11676
189277	Linear peptide	SLFNTIAVL	77	85			gag protein	AAY98604.1	Human immunodeficiency virus 1	11676
189280	Linear peptide	SLYLTVATL
189285	Linear peptide	SLYNSVATL	77	85			gag protein	AAK30999.1	Human immunodeficiency virus 1	11676
189286	Linear peptide	SLYNTAATL
189287	Linear peptide	SLYNTIAIL	68	76			gag protein	ADO94802.1	Human immunodeficiency virus 1	11676
189288	Linear peptide	SLYNTIATL	77	85			gag protein	AAV53168.1	Human immunodeficiency virus 1	11676
189289	Linear peptide	SLYNTISVL	68	76			gag protein	ADO93742.1	Human immunodeficiency virus 1	11676
189290	Linear peptide	SLYNTITVL	77	85			gag protein	ACO48925.1	Human immunodeficiency virus 1	11676
189291	Linear peptide	SLYNTVAAL
189292	Linear peptide	SLYNTVAIF	1	9			gag protein	ABC40295.1	Human immunodeficiency virus 1	11676
189293	Linear peptide	SLYNTVAVL	77	85			gag protein	BAB88077.1	Human immunodeficiency virus 1	11676
189294	Linear peptide	SLYNTVSTL	51	59			Gag	O89360	Human immunodeficiency virus 1	11676
189295	Linear peptide	SLYNTVVTL	77	85			gag protein	AEB70304.1	Human immunodeficiency virus 1	11676
189297	Linear peptide	SLYQTVATL
189300	Linear peptide	SVYNTVATL	77	85			gag polyprotein	BAB88548.1	Human immunodeficiency virus 1	11676
189566	Linear peptide	ALADLPVTV	288	296			glycosyl transferase	WP_015631503.1	Mycobacterium tuberculosis	1773
189569	Linear peptide	AMLDHAGDM
189849	Linear peptide	SIIIPTLNV	26	34			glycosyltransferase	WP_016721157.1	Mycobacterium tuberculosis	1773
189894	Linear peptide	VLAGSVDEL	165	173			cyclopropane-fatty-acyl-phospholipid synthase	WP_010924246.1	Mycobacterium tuberculosis	1773
190821	Linear peptide	KLLGLGINAV	303	312			polyprotein	AAT94261.1	Hepatitis C virus	11103
190822	Linear peptide	KLSGLGINAI	1406	1415			polyprotein	BAB18801.1	Hepatitis C virus	11103
190826	Linear peptide	KSLFNTIATL	76	85			gag polyprotein	CAB81949.1	Human immunodeficiency virus 1	11676
190827	Linear peptide	KSLYNTIATL	76	85			gag protein	AAN08336.1	Human immunodeficiency virus 1	11676
190828	Linear peptide	KSLYNTIAVL	76	85			gag protein	ABI20203.1	Human immunodeficiency virus 1	11676
190829	Linear peptide	KSLYNTVAVL	76	85			gag protein	BAB88077.1	Human immunodeficiency virus 1	11676
190959	Linear peptide	RSLFNTIATL	76	85			gag polyprotein	BAB19174.1	Human immunodeficiency virus 1	11676
190960	Linear peptide	RSLFNTIAVL	76	85			gag-pol polyprotein	BAC02551.1	Human immunodeficiency virus 1	11676
190961	Linear peptide	RSLFNTVAVL	76	85			gag protein	BAC45024.1	Human immunodeficiency virus 1	11676
190962	Linear peptide	RSLYNTIATL	76	85			gag polyprotein	BAB88540.1	Human immunodeficiency virus 1	11676
190963	Linear peptide	RSLYNTIAVL	76	85			gag-pol fusion polyprotein precursor	CAY83124.1	Human immunodeficiency virus 1	11676
190974	Linear peptide	SLFNTIATLY	77	86			gag polyprotein	BAB19174.1	Human immunodeficiency virus 1	11676
190975	Linear peptide	SLFNTVAVLY	77	86			gag protein	BAC45024.1	Human immunodeficiency virus 1	11676
190978	Linear peptide	SLYNTIATLY	77	86			gag protein	AAV53168.1	Human immunodeficiency virus 1	11676
190979	Linear peptide	SLYNTIAVLY	77	86			gag protein	ABI20203.1	Human immunodeficiency virus 1	11676
190980	Linear peptide	SLYNTVATLY	77	86			gag protein	AAV53216.1	Human immunodeficiency virus 1	11676
190981	Linear peptide	SLYNTVAVLY	77	86			gag protein	BAB88077.1	Human immunodeficiency virus 1	11676
193665	Linear peptide	ALLGLTLGV	17	25			envelope glycoprotein B	NP_044629.1	Herpes simplex virus (type 1 / strain 17)	10299
193837	Linear peptide	FVLATGDFV	287	295			envelope glycoprotein B	NP_044629.1	Herpes simplex virus (type 1 / strain 17)	10299
193840	Linear peptide	GIFEDRAPV	184	192			Glycoprotein B	P10211.1	Herpes simplex virus (type 1 / strain 17)	10299
194160	Linear peptide	LLIEGIFFI	151	159			BaRF1	AFJ06848.1	Human gammaherpesvirus 4	10376
194181	Linear peptide	LLTTPKFTV	344	352			envelope glycoprotein B	NP_044629.1	Herpes simplex virus (type 1 / strain 17)	10299
194227	Linear peptide	NLLTTPKFT	343	351			Glycoprotein B	P10211.1	Herpes simplex virus (type 1 / strain 17)	10299
194440	Linear peptide	TMYYKDVTV	162	170			envelope glycoprotein B	NP_044629.1	Herpes simplex virus (type 1 / strain 17)	10299
194555	Linear peptide	WQWEHIPPA	1281	1289			BNRF1	AGZ95154.1	Human gammaherpesvirus 4	10376
194567	Linear peptide	YLANGGFLI	442	450			envelope glycoprotein B	NP_044629.1	Herpes simplex virus (type 1 / strain 17)	10299
226853	Linear peptide	ILIEGIFFV	156	164			ribonucleotide reductase subunit 2	NP_040141.1	Human alphaherpesvirus 3	10335
226871	Linear peptide	MILIEGIFFV	155	164			ribonucleotide reductase subunit 2	NP_040141.1	Human alphaherpesvirus 3	10335
236320	Linear peptide	RVCEKMALYDVVSTL	2587	2601			Hepatitis C virus core, matrix, envelope and non-structural protein RNA.	AAA72945.1	Hepatitis C virus (isolate BK)	11105
238379	Linear peptide	FLVGQLFTF	285	293			polyprotein	ACE82359.1	Hepatitis C virus subtype 1a	31646
244160	Linear peptide	AAAGDKLSL	273	281			surface antigen 2 (CA-2)	XP_818927.1	Trypanosoma cruzi strain CL Brener	353153
244167	Linear peptide	ALQVTNHRYL					surface antigen 2	SRC298288	Trypanosoma cruzi	5693
244168	Linear peptide	ALRNLRVFL					surface antigen 2	SRC298288	Trypanosoma cruzi	5693
244296	Linear peptide	TVFDASRSTV					surface antigen 2	SRC298288	Trypanosoma cruzi	5693
251793	Linear peptide	AIIIAVLLV	351	359			transmembrane serine/threonine-protein kinase A	WP_016330371.1	Mycobacterium tuberculosis	1773
252997	Linear peptide	ALAIIIAVL	349	357			transmembrane serine/threonine-protein kinase A	WP_016330371.1	Mycobacterium tuberculosis	1773
418940	Linear peptide	AAAAGWQTL	26	34			PPE family protein PPE68	KAM81677.1	Mycobacterium tuberculosis H37Ra	419947
418942	Linear peptide	ALAAATPMVV	64	73			PPE family protein PPE68	KAM81677.1	Mycobacterium tuberculosis H37Ra	419947
418943	Linear peptide	ALAMEVYQA	148	156			PPE family protein PPE68	KAM81677.1	Mycobacterium tuberculosis H37Ra	419947
418944	Linear peptide	ALDAQAVEL	37	45			PPE family protein PPE68	KAM81677.1	Mycobacterium tuberculosis H37Ra	419947
418945	Linear peptide	ALTEMDYFI	133	141			PPE family protein PPE68	KAM81677.1	Mycobacterium tuberculosis H37Ra	419947
418947	Linear peptide	AMPPELNTA	5	13			PPE family protein PPE68	KAM81677.1	Mycobacterium tuberculosis H37Ra	419947
418964	Linear peptide	ELTARLNSL	44	52			PPE family protein PPE68	KAM81677.1	Mycobacterium tuberculosis H37Ra	419947
418967	Linear peptide	FIRMWNQAAL	140	149			PPE family protein PPE68	KAM81677.1	Mycobacterium tuberculosis H37Ra	419947
418975	Linear peptide	GINTIPIAL	126	134			PPE family protein PPE68	KAM81677.1	Mycobacterium tuberculosis H37Ra	419947	This conserved sequence is present in PPE2, PPE3, PPE46, PPE47, PPE66, and PPE68 of Mycobacterium tuberculosis H37Ra.
418997	Linear peptide	KLEPMASIL	166	174			PPE family protein PPE68	KAM81677.1	Mycobacterium tuberculosis H37Ra	419947
419002	Linear peptide	LIEKPVAPSV	299	308			PPE family protein PPE68	KAM81677.1	Mycobacterium tuberculosis H37Ra	419947
419006	Linear peptide	LLRAESLPGA	277	286			PPE family protein PPE68	KAM81677.1	Mycobacterium tuberculosis H37Ra	419947
419031	Linear peptide	QLPPAATQTL	200	209			PPE family protein PPE68	KAM81677.1	Mycobacterium tuberculosis H37Ra	419947
419045	Linear peptide	SLPEIAANHI	105	114			PPE family protein PPE68	KAM81677.1	Mycobacterium tuberculosis H37Ra	419947
419325	Linear peptide	RLGPVQNEV	1628	1636			Genome polyprotein	O92532.3	Hepatitis C virus	11103
419410	Linear peptide	WLGNIIMFA	2828	2836			polyprotein	ABR25251.1	Hepatitis C virus	11103
422987	Linear peptide	DLPlIIQRL	457	465			RNA-dependent RNA polymerase	ACH97782.1	Hepatitis C virus genotype 1	41856
422999	Linear peptide	GILVLFGFF	827	835			polyprotein	ABD97104.1	Hepatitis C virus genotype 3	356114
423010	Linear peptide	IMGGELPTA	1874	1882			polyprotein	AAC03058.1	Hepatitis C virus genotype 3	356114
423011	Linear peptide	IMSGEVPSM	211	219			polyprotein	AER51001.1	Hepatitis C virus genotype 1	41856
423019	Linear peptide	KLVALGLNAV	380	389			protease-helicase	AER50967.1	Hepatitis C virus genotype 1	41856
423046	Linear peptide	QMAMIKLGAL	126	135			polyprotein	ACX44272.1	Hepatitis C virus genotype 1	41856
423062	Linear peptide	SSVSTALAEL	2338	2347			polyprotein	ACH99674.1	Hepatitis C virus genotype 1	41856
423068	Linear peptide	VLFGLMALTL	13	22			polyprotein	ACX44241.1	Hepatitis C virus genotype 1	41856
423069	Linear peptide	VLTESSVSTA	2334	2343			polyprotein	ACH99674.1	Hepatitis C virus genotype 1	41856
423075	Linear peptide	VVLFGLMAL	12	20			polyprotein	ACX44241.1	Hepatitis C virus genotype 1	41856
489445	Linear peptide	AAYPITGKL	29	37			IMMUNOGENIC PROTEIN MPT63 (ANTIGEN MPT63/MPB63) (16 kDa IMMUNOPROTECTIVE EXTRACELLULAR PROTEIN)	NP_216442.1	Mycobacterium tuberculosis	1773
489460	Linear peptide	AIATFAAPV	18	26			IMMUNOGENIC PROTEIN MPT63 (ANTIGEN MPT63/MPB63) (16 kDa IMMUNOPROTECTIVE EXTRACELLULAR PROTEIN)	NP_216442.1	Mycobacterium tuberculosis	1773
489480	Linear peptide	ATFAAPVAL	20	28			IMMUNOGENIC PROTEIN MPT63 (ANTIGEN MPT63/MPB63) (16 kDa IMMUNOPROTECTIVE EXTRACELLULAR PROTEIN)	NP_216442.1	Mycobacterium tuberculosis	1773
489484	Linear peptide	AVAVVAMAAI	10	19			IMMUNOGENIC PROTEIN MPT63 (ANTIGEN MPT63/MPB63) (16 kDa IMMUNOPROTECTIVE EXTRACELLULAR PROTEIN)	NP_216442.1	Mycobacterium tuberculosis	1773
489812	Linear peptide	TMIKTAVAVV	5	14			IMMUNOGENIC PROTEIN MPT63 (ANTIGEN MPT63/MPB63) (16 kDa IMMUNOPROTECTIVE EXTRACELLULAR PROTEIN)	NP_216442.1	Mycobacterium tuberculosis	1773
490098	Linear peptide	ALLAFTLGV	137	145			elongation factor 1-alpha	XP_001682260.1	Leishmania major	5664
490102	Linear peptide	ALRERRMKV	404	412			putative proteasome regulatory ATPase subunit 2	XP_001681853.1	Leishmania major	5664
490745	Linear peptide	CLALIAWRV	385	393			excreted/secreted protein 38	AAY89230.1	Leishmania major	5664
491066	Linear peptide	FMEVFGMLV	77	85			excreted/secreted protein 78	AAY42348.1	Leishmania major	5664
491245	Linear peptide	GLEQQIQEI	187	195			putative proteasome regulatory ATPase subunit 2	XP_001681853.1	Leishmania major	5664
492656	Linear peptide	KIYQIGRSV	286	294			putative ribosomal protein L3	XP_001685639.1	Leishmania major	5664
492663	Linear peptide	KLVRELFRV	263	271			putative proteasome regulatory ATPase subunit 2	XP_001681853.1	Leishmania major	5664
492999	Linear peptide	LLHDRQHSI	149	157			putative proteasome regulatory ATPase subunit 2	XP_001681853.1	Leishmania major	5664
493004	Linear peptide	LLPAPLVSV	320	328			excreted/secreted protein 37	AAY42350.1	Leishmania major	5664
493314	Linear peptide	MLLWTAVAV	575	583			excreted/secreted protein 37	AAY42350.1	Leishmania major	5664
493317	Linear peptide	MLQTNSLAL	150	158			excreted/secreted protein 78	AAY42348.1	Leishmania major	5664
493318	Linear peptide	MLVQSCTSI	83	91			excreted/secreted protein 78	AAY42348.1	Leishmania major	5664
493470	Linear peptide	MVLNAMAWL	92	100			excreted/secreted protein 38	AAY89230.1	Leishmania major	5664
493612	Linear peptide	PLSPATRRL	143	151			excreted/secreted protein 38	AAY89230.1	Leishmania major	5664
493644	Linear peptide	QLNKKIYQI	282	290			putative ribosomal protein L3	XP_001685639.1	Leishmania major	5664
494095	Linear peptide	RLAGFLAGL	336	344			excreted/secreted protein 38	AAY89230.1	Leishmania major	5664
494748	Linear peptide	SLQFSAFLL	24	32			excreted/secreted protein 78	AAY42348.1	Leishmania major	5664
495464	Linear peptide	TLGVKQMVV	142	150			elongation factor 1-alpha	XP_001682260.1	Leishmania major	5664
495466	Linear peptide	TLLDALGML	215	223			elongation factor 1-alpha	XP_001682260.1	Leishmania major	5664
495467	Linear peptide	TMLELLTQL	306	314			putative proteasome regulatory ATPase subunit 2	XP_001681853.1	Leishmania major	5664
495976	Linear peptide	VVAGMLRWV	69	77			excreted/secreted protein 38	AAY89230.1	Leishmania major	5664
495978	Linear peptide	VVSVLTHSV	110	118			excreted/secreted protein 78	AAY42348.1	Leishmania major	5664
495981	Linear peptide	WIPPVVSVL	106	114			excreted/secreted protein 78	AAY42348.1	Leishmania major	5664
496041	Linear peptide	YLRTFPAAL	135	143			excreted/secreted protein 37	AAY42350.1	Leishmania major	5664
527659	Linear peptide	TLLEFVFKL
538626	Linear peptide	ALSALLTKL	702	710			Tegument protein UL46	P10230.2	Herpes simplex virus (type 1 / strain 17)	10299
538660	Linear peptide	FLTCTDRSV	66	74			Tegument protein UL46	P10230.2	Herpes simplex virus (type 1 / strain 17)	10299
539268	Linear peptide	FQANTPPAV	39	47			M	AEK26905.1	Human metapneumovirus	162145
539655	Linear peptide	LYPSLIFDI	886	894			polyprotein	ACZ60105.1	Hepatitis C virus subtype 3a	356426
540047	Linear peptide	VLDDHYKTAL	2489	2498			polyprotein	ACZ60105.1	Hepatitis C virus subtype 3a	356426
558581	Linear peptide	CINGVFWTV					polyprotein	SRC280504	Hepatitis C virus	11103
558582	Linear peptide	CLNGVCWTV	1077	1085			polyprotein	ABR27415.1	Hepatitis C virus	11103
558683	Linear peptide	KLLALGINAV	380	389			NS3-4 protease, partial	AFX75603.1	Hepatitis C virus	11103
558684	Linear peptide	KLSSLGLNSV	1406	1415			polyprotein	ABR27408.1	Hepatitis C virus	11103
558685	Linear peptide	KLTALGINAV					polyprotein	SRC280504	Hepatitis C virus	11103
558686	Linear peptide	KLVALGNNAV	109	118			polyprotein, partial	AAB88154.1	Hepatitis C virus	11103
558687	Linear peptide	KLVTLGINAV	1406	1415			polyprotein	AAY82032.1	Hepatitis C virus	11103
