# Supplementary material for: Expitope 2.0: a tool to assess immunotherapeutic antigens for their potential cross-reactivity against naturally expressed proteins in human tissues
Source: BMC Cancer. 2017 Dec 28;17:892. doi: 10.1186/s12885-017-3854-8 (PMC5745885; doi:10.1186/s12885-017-3854-8)
Supplement: Supplementary file 2 — TableS2_Healthy. Comma-separated table containing Table S2. (CSV 67 kb) [file 12885_2017_3854_MOESM2_ESM.csv]

Epitope ID	Object Type	Description	Starting Position	Ending Position	Non-peptidic epitope ChEBI ID	Epitope Synonyms	Antigen Name	Antigen ID	Organism Name	Organism ID	Epitope Comments
155	Linear peptide	AAGIGILTV	27	35			Melanoma antigen recognized by T-cells 1	Q16655.1	Homo sapiens	9606
716	Linear peptide	ADLMGYIPLV	131	140			structural protein	BAA00705.1	Hepatitis C virus	11103
2014	Linear peptide	AIMDKNIIL	122	130			Non-structural protein 1	Q6LDH2.1	Influenza A virus (A/Netherlands/602/2009(H1N1))	643212
2015	Linear peptide	AIMDKNIML	122	130			Non-structural protein 1	P03495.1	Influenza A virus	11320	The epitope sequence was provided in a personal communication with the author.
2021	Linear peptide	AIMEKNIIL	122	130			NS1 protein	AAG10764.1	Influenza A virus (A/Indiana/08/2011(H3N2))	1081253
2526	Linear peptide	ALFFFDIDLL	347	356			HCMVUL83	CAA35357.1	Human betaherpesvirus 5	10359
2556	Linear peptide	ALGGGATGV	385	393			PE_PGRS 33	AAU10330.1	Mycobacterium tuberculosis	1773
2726	Linear peptide	ALLQVRKHLNDRINR	136	150			thrombospondin related anonymous protein	AAA29775.1	Plasmodium falciparum 3D7	36329	This peptide was selected for study from a set of 113 15-mers (overlapping by 10 residues) corresponding to the entire sequence of SSP2 (a.k.a TRAP) since it conforms to the HLA-A2 binding motif.
2801	Linear peptide	ALNTLVKQL	940	948			S protein	ABF65836.1	SARS coronavirus	227859
2802	Linear peptide	ALNTPKDHI	139	147			Nucleoprotein	P59595.1	SARS coronavirus	227859
2901	Linear peptide	ALSTGLIHL	684	692			polyprotein	ABV46054.1	Hepatitis C virus genotype 1	41856	The epitope sequence is conserved among HCV genotypes 1a and 1b. The epitope is part of the E2 protein.
3146	Linear peptide	AMLDLLKSV	664	672			Proto-oncogene DBL	P10911.3	Homo sapiens	9606
3148	Linear peptide	AMLHWSLIL	2372	2380			Genome polyprotein	P03314.1	Yellow fever virus 17D	11090
3151	Linear peptide	AMLNGLIYV	391	399			Kelch repeat protein A55	P21073.1	Vaccinia virus	10245
3546	Linear peptide	APFDETLGEEDKDLD	546	560			thrombospondin related anonymous protein	AAA29775.1	Plasmodium falciparum 3D7	36329	This peptide was selected for study from a set of 113 15-mers (overlapping by 10 residues) corresponding to the entire sequence of SSP2 (a.k.a TRAP) since it conforms to the HLA-A2 binding motif.
4002	Linear peptide	AQLLTEFAI	254	262			PPE family protein	NP_337616.1	Mycobacterium tuberculosis	1773
4916	Linear peptide	ATDALMTGF	1436	1444			polyprotein	ABU97067.1	Hepatitis C virus subtype 1b	31647	The epitope sequence is present in multiple Hepatitis C virus strains.
4917	Linear peptide	ATDALMTGY	1436	1444			polyprotein	ACB87119.1	Hepatitis C virus subtype 1a	31646
6286	Linear peptide	CGFADLMGYIPLVGAPLGGAARALA	128	152			structural protein	BAA00705.1	Hepatitis C virus	11103
6435	Linear peptide	CINGVCWTV	1073	1081			polyprotein	BAB18806.1	Hepatitis C virus	11103
6564	Linear peptide	CLGGLITMV					Latent membrane protein 2	SRC265913	Human gammaherpesvirus 4	10376	The sequence of this epitope was obtained from a clinical isolate and is not available in GenBank or SwissProt.
6568	Linear peptide	CLGGLLTMV	307	315			latent membrane protein 2A	ADK56638.1	Human gammaherpesvirus 4	10376
6615	Linear peptide	CLPACVYGL	275	283			nucleoprotein	ABC66726.1	Influenza A virus	11320
6630	Linear peptide	CLTEYILWV	79	87			putative 21.7k protein	AAB96558.1	Modified Vaccinia Ankara virus	467144	The epitope sequence is highly conserved in vaccinia virus, variola viruses, cowpox virus and monkeypox virus.
6889	Linear peptide	CQNGACWTS	61	69			Agglutinin isolectin 1 precursor	P10968.2	Triticum aestivum	4565
7291	Linear peptide	CVNGSCFTV	213	221			neuramindase	AAT73327.1	Influenza A virus (A/Puerto Rico/8/1934(H1N1))	211044
7292	Linear peptide	CVNGVCWTV	1073	1081			Genome polyprotein	P26662.3	Hepatitis C virus (isolate Japanese)	11116
9033	Linear peptide	DLCGSVFLV	279	287			polyprotein	ABV46054.1	Hepatitis C virus genotype 1	41856	The epitope sequence is conserved among HCV genotypes 1a and 1b. The epitope is part of the E1 protein.
9041	Linear peptide	DLDEPEQFRL	543	552			Thrombospondin-related anonymous protein precursor	P16893.1	Plasmodium falciparum	5833	Data originally imported from the HLA Ligand Database and recurated.
9162	Linear peptide	DLLEEGNTL	111	119			Liver stage antigen-3 precursor	Q9U0P0	Plasmodium falciparum	5833
9203	Linear peptide	DLMGYIPLV	132	140			core protein	AAS15483.1	Hepatitis C virus	11103
9280	Linear peptide	DLSLRRFMV	226	234			Nucleoprotein	P04851.1	Measles virus strain Edmonston	11235
9414	Linear peptide	DMWEHAFYL	160	168			Superoxide dismutase	P17670.1	Mycobacterium tuberculosis	1773
10987	Linear peptide	EAAGIGILTV	26	35			Melanoma antigen recognized by T-cells 1	Q16655.1	Homo sapiens	9606
12941	Linear peptide	ELAGIGILTV
14647	Linear peptide	EVDLYLLMDCSGSIR	46	60			thrombospondin related anonymous protein	AAA29775.1	Plasmodium falciparum 3D7	36329	This peptide was selected for study from a set of 113 15-mers (overlapping by 10 residues) corresponding to the entire sequence of SSP2 (a.k.a TRAP) since it conforms to the HLA-A2 binding motif.
15173	Linear peptide	FAFRDLCIV	52	60			Protein E6	P03126.1	Human papillomavirus type 16	333760
16626	Linear peptide	FLGMESCGI	266	274			Actin, cytoplasmic 1	P60709.1	Homo sapiens	9606
16652	Linear peptide	FLIFFDLFLV	14	23			sporozoite surface protein 2	NP_705260.1	Plasmodium falciparum 3D7	36329	Imported from the TopBank database (internal database of LIAI) and recurated.
16706	Linear peptide	FLLALLSCL	177	185			structural protein	BAA00705.1	Hepatitis C virus	11103
16755	Linear peptide	FLLTRILTI	183	191			envelope protein	BAF48755.1	Hepatitis B virus	10407
16833	Linear peptide	FLPSDFFPSV	18	27			core protein	AAL31859.1	Hepatitis B virus	10407
16978	Linear peptide	FLYALALL	356	363			membrane protein	AAA45887.1	Human gammaherpesvirus 4	10376
16979	Linear peptide	FLYALALLL	356	364			membrane protein	AAA45887.1	Human gammaherpesvirus 4	10376
17110	Linear peptide	FMVFLQTHI	562	570			EBNA-1 protein	Q777E1	Human gammaherpesvirus 4	10376
17119	Linear peptide	FMYSDFHFI	46	54			PA	BAA99401.1	Influenza A virus	11320
18941	Linear peptide	GDCVQGDWCPISGGL	21	35			transcriptional activator Tax	AAG31572.1	Human T-lymphotropic virus 1	11908
20213	Linear peptide	GIAGGLALL	515	523			thrombospondin related anonymous protein	AAA29775.1	Plasmodium falciparum	5833
20354	Linear peptide	GILGFVFTL	58	66			matrix protein 1	ABG80283.1	Influenza A virus	11320
20355	Linear peptide	GILGFVFTLT	58	67			Matrix protein 1	P03485.1	Influenza A virus (A/Puerto Rico/8/1934(H1N1))	211044
20369	Linear peptide	GILTVSVAV	120	128			14 kDa antigen	P0A5B7.2	Mycobacterium tuberculosis	1773
20788	Linear peptide	GLCTLVAML	259	267			Transcriptional regulator IE63 homolog	Q04360.1	Human herpesvirus 4 (strain B95-8)	10377
20837	Linear peptide	GLFGAIAGFI	345	354			hemagglutinin precursor	S69889	Influenza A virus	11320
20894	Linear peptide	GLGWVGWLL	89	97			polyprotein [Hepatitis C virus]	BAF91806.1	Hepatitis C virus	11103
20910	Linear peptide	GLIDIAPHQI	33	42			ISONIAZID INDUCTIBLE GENE PROTEIN INIB	NP_214855.1	Mycobacterium tuberculosis H37Ra	419947
20911	Linear peptide	GLIDIAPHQISS	33	44			ISONIAZID INDUCTIBLE GENE PROTEIN INIB	NP_214855.1	Mycobacterium tuberculosis H37Ra	419947
20912	Linear peptide	GLIDIAPHQISSV	33	45			ISONIAZID INDUCTIBLE GENE PROTEIN INIB	NP_214855.1	Mycobacterium tuberculosis H37Ra	419947
20929	Linear peptide	GLIMVLSFL	401	409			Circumsporozoite protein precursor	P02893.1	Plasmodium falciparum	5833	Imported from the TopBank database (internal database of LIAI) and recurated.
20994	Linear peptide	GLLGNVSTV					Circumsporozoite-related antigen	SRC280086	Plasmodium falciparum	5833	Imported from the TopBank database (internal database of LIAI) and recurated.
21000	Linear peptide	GLLHHAPSL	308	316			glutamine synthetase GLNA1 (glutamine synthase) (GS-I)	NP_216736.1	Mycobacterium tuberculosis	1773
21038	Linear peptide	GLMNNAFEWI	188	197			cysteine proteinase cruzipain (EC 3.4.22.-) - Trypanosoma cruzi	A45629	Trypanosoma cruzi	5693
21078	Linear peptide	GLPVEYLQV	48	56			Antigen 85-A precursor	P0A4V2.1	Mycobacterium tuberculosis H37Rv	83332
21347	Linear peptide	GMSRIGMEV	317	325			Nucleoprotein	P59595.1	SARS coronavirus	227859
22738	Linear peptide	GTLGIVCPI	85	93			E7 protein	ABL96585.1	Human papillomavirus type 16	333760
24216	Linear peptide	HLGNKYLV					Circumsporozoite	SRC280011	Plasmodium falciparum	5833
24217	Linear peptide	HLGNVKYLV	3	11			Thrombospondin-related anonymous protein precursor	P16893.1	Plasmodium falciparum	5833
24256	Linear peptide	HLMIDRPYV	29	37			Hemagglutinin glycoprotein	P08362.1	Measles virus strain Edmonston	11235
24357	Linear peptide	HMWNFISGI	1764	1772			polyprotein	ABV46054.1	Hepatitis C virus genotype 1	41856	The epitope sequence is conserved among HCV genotypes 1a and 1b. The epitope is part of the NS4b protein.
25298	Linear peptide	IAGNSAYEYV	619	628			Glycoprotein B precursor	P06473.1	Human betaherpesvirus 5	10359
26783	Linear peptide	IKEYLNKIQNSLSTEWSPCS	316	335			Circumsporozoite protein precursor	P19597.2	Plasmodium falciparum 3D7	36329	This HLA-DR restricted peptide contains HLA-A2 restricted epitope A2.319.
26784	Linear peptide	IKEYLNKIQNSLSTEWSPCSWSPCS					Circumsporozoite	SRC280011	Plasmodium falciparum	5833
26869	Linear peptide	IKPGSANKPKDELDYANDIE	346	365			Circumsporozoite protein precursor	P19597.2	Plasmodium falciparum 3D7	36329	This peptide contains HLA-B35 restricted epitope B35.353.
27000	Linear peptide	ILDKKVEKV	570	578			Heat shock protein HSP 90-beta	P08238.4	Homo sapiens	9606
27182	Linear peptide	ILLNKHIDA	352	360			Nucleoprotein	P59595.1	SARS coronavirus	227859
27217	Linear peptide	ILMWEAVTL	100	108			VP1	AAL37677.1	JC polyomavirus	10632
27234	Linear peptide	ILNNPKASL	303	311			Nucleoprotein	P03418.1	Human respiratory syncytial virus A strain Long	11260
27369	Linear peptide	ILSVSSFLFV	7	16			Circumsporozoite protein precursor	P02893.1	Plasmodium falciparum 7G8	57266	Data originally imported from the HLA Ligand Database and recurated.
27578	Linear peptide	IMVLSFLFL	403	411			Circumsporozoite protein precursor	P02893.1	Plasmodium falciparum 7G8	57266	Data originally imported from the HLA Ligand Database and recurated.
27983	Linear peptide	IPPSFLQAMRKYSPF	101	115			transcriptional activator Tax	AAG31572.1	Human T-lymphotropic virus 1	11908
28508	Linear peptide	ISGGLCSARLHRHAL	31	45			transcriptional activator Tax	AAG31572.1	Human T-lymphotropic virus 1	11908
30968	Linear peptide	KGILGFVFTLTV	57	68			Matrix protein 1	P03485.1	Influenza A virus	11320
31337	Linear peptide	KILSVFFLA	2	10			Circumsporozoite protein-related antigen precursor	P04923.2	Plasmodium falciparum	5833	Imported from the TopBank database (internal database of LIAI) and recurated.
31747	Linear peptide	KLAEAIFKL	3054	3062			Genome polyprotein	P29990.1	Dengue virus 2 Thailand/16681/84	31634
31902	Linear peptide	KLIANNTRV	242	250			Antigen 85-A precursor	P0A4V2.1	Mycobacterium tuberculosis H37Rv	83332
31941	Linear peptide	KLKKIKNSI					Circumsporozoite	SRC280011	Plasmodium falciparum 7G8	57266	Data originally imported from the HLA Ligand Database and recurated. The epitope is based on the sequence YLKKIKNSI from the circumsporozoite protein of Plasmodium falciparum 7G8 strain (Swiss-Prot. record P02893).
31942	Linear peptide	KLKKIKNSL									Data originally imported from the HLA Ligand Database and recurated. The epitope is based on the sequence YLKKIKNSI from the circumsporozoite protein of Plasmodium falciparum 7G8 strain (Swiss-Prot. record P02893).
32073	Linear peptide	KLPDLCTEL	13	21			Protein E6	P06463.1	Human papillomavirus type 18	333761
32085	Linear peptide	KLPQLCTEL	18	26			Protein E6	P03126.1	Human papillomavirus type 16	333760
32101	Linear peptide	KLQEQQSDL	191	199			Liver stage antigen	Q25893	Plasmodium falciparum	5833	Data originally imported from the HLA Ligand Database and recurated. The protein has multiple repeats of the sequence.
32133	Linear peptide	KLRKPKHKKL	104	113			Circumsporozoite protein precursor	P02893.1	Plasmodium falciparum 7G8	57266	Data originally imported from the HLA Ligand Database and recurated.
32165	Linear peptide	KLSGLGINAV	1406	1415			polyprotein	AAK08509.1	Hepatitis C virus subtype 1b	31647
32167	Linear peptide	KLSGLGLNAV	1406	1415			polyprotein	ABV46292.1	Hepatitis C virus subtype 1b	31647
32179	Linear peptide	KLSSLGLNAV	1406	1415			polyprotein	ABU97067.1	Hepatitis C virus subtype 1b	31647
32208	Linear peptide	KLVALGINAV	1406	1415			polyprotein	ABR25251.1	Hepatitis C virus	11103
32209	Linear peptide	KLVALGVNAV	1406	1415			polyprotein	ABV46144.2	Hepatitis C virus subtype 1a	31646
32210	Linear peptide	KLVAMGINAV	1406	1415			polyprotein	AAY82027.1	Hepatitis C virus	11103	The epitope is a natural variant of the sequence KLVALGINAV, which arose in one of the patients studied in the chronic phase of infection, replacing the original sequence as the dominant variant in the viruses isolated at >6 mo after infection.
32241	Linear peptide	KLWCRHFCV	576	584			hemagglutinin	AAR89413.1	Measles virus	11234
32357	Linear peptide	KMLKEMGEV	137	145			Nucleoprotein	P03418.1	Human respiratory syncytial virus A strain Long	11260
33967	Linear peptide	KVDDTFYYV	74	82			Host range protein 2	P68598.1	Modified Vaccinia Ankara virus	467144	The epitope sequence is highly conserved in vaccinia virus, variola viruses and cowpox virus. In monkeypox virus the corresponding sequence is KVDYTLYYV.
34598	Linear peptide	KYSPFRNGYMEPTLG	111	125			transcriptional activator Tax	AAG31572.1	Human T-lymphotropic virus 1	11908
34851	Linear peptide	LALLLLDRL	220	228			Nucleoprotein	P59595.1	SARS coronavirus	227859
35785	Linear peptide	LFAAFPSFA	21	29			14 kDa antigen	P0A5B7.2	Mycobacterium tuberculosis	1773
35844	Linear peptide	LFGYPVYV	12	19			transcriptional activator Tax	AAG31572.1	Human T-lymphotropic virus 1	11908
37097	Linear peptide	LLALLSCLTV	178	187			Genome polyprotein	P26664.3	Hepatitis C virus (isolate 1)	11104
37140	Linear peptide	LLDAHIPQL	3	11			Hypothetical protein esxG (PE family protein)	O53692.1	Mycobacterium tuberculosis H37Rv	83332	Peptide shown by peptide truncation analysis to be the minimal epitope recognized by a HLA-A*0201 restricted CD8 T cell clone derived from a healthy individual who was PPD+ by in vitro stimulation with source species-infected dendritic cells. For truncation analysis, each peptide is tested over a range of concentrations, and that giving a T cell response at the lowest concentration is defined as …
37153	Linear peptide	LLDFVRFMGV	284	293			Epstein-Barr nuclear antigen 6	P03204.1	Human gammaherpesvirus 4	10376
37286	Linear peptide	LLFNILGGWV	1807	1816			polyprotein	ABV46054.1	Hepatitis C virus genotype 1	41856	The epitope sequence is conserved among HCV genotypes 1a and 1b. The epitope is part of the NS4b protein.
37473	Linear peptide	LLLDRLNQL	223	231			Nucleoprotein	P59595.1	SARS coronavirus	227859
37573	Linear peptide	LLMGTLGIV	82	90			E7 protein	ABL96585.1	Human papillomavirus type 16	333760
37590	Linear peptide	LLMWEAVTV	108	116			VP1	BAF93325.1	Human polyomavirus 1	1891762
37700	Linear peptide	LLQDSVDFSL	79	88			Vimentin	P08670.4	Homo sapiens	9606
37827	Linear peptide	LLSTNLPYGKTNLTD	121	135			thrombospondin related anonymous protein	AAA29775.1	Plasmodium falciparum 3D7	36329	This peptide was selected for study from a set of 113 15-mers (overlapping by 10 residues) corresponding to the entire sequence of SSP2 (a.k.a TRAP) since it conforms to the HLA-A2 binding motif.
37887	Linear peptide	LLVDLLWLL	167	175			Latent membrane protein 1	P03230.1	Human gammaherpesvirus 4	10376
37938	Linear peptide	LLWAARPRL	356	364			Putative BARF0 protein	Q8AZJ4	Human herpesvirus 4 (strain B95-8)	10377
37955	Linear peptide	LLWSYAMGV	331	339			Nucleoprotein	P04851.1	Measles virus strain Edmonston	11235
37959	Linear peptide	LLWTLVVL	329	336			membrane protein	AAA45887.1	Human gammaherpesvirus 4	10376
37960	Linear peptide	LLWTLVVLL	329	337			membrane protein	AAA45887.1	Human gammaherpesvirus 4	10376
38049	Linear peptide	LMIGTAAAV	15	23			Antigen 85-B precursor (85B) (Extracellular alpha-antigen) (Antigen 85 complex B) (Ag85B) (Mycolyl transferase 85B) (Fibronectin-binding protein B) (30 kDa extracellular protein)	P31952	Mycobacterium tuberculosis	1773
38052	Linear peptide	LMIIPLINV	542	550			Glycoprotein GP85 precursor	P03231.1	Human herpesvirus 4 (strain B95-8)	10377
38775	Linear peptide	LPYGKTNLTDALLQV	126	140			thrombospondin related anonymous protein	AAA29775.1	Plasmodium falciparum 3D7	36329	This peptide was selected for study from a set of 113 15-mers (overlapping by 10 residues) corresponding to the entire sequence of SSP2 (a.k.a TRAP) since it conforms to the HLA-A2 binding motif.
38881	Linear peptide	LQLPQGTTL	160	168			Nucleoprotein	P59595.1	SARS coronavirus	227859
40262	Linear peptide	LVALLACLTV	8	17			Cytochrome P450 2A7	P20853.1	Homo sapiens	9606	The following refers to the epitope id as found in the original FIMM database: P001345
40264	Linear peptide	LVALLVCLTV	8	17			Cytochrome P450 2A6	P11509.3	Homo sapiens	9606	The following refers to the epitope id as found in the original FIMM database: P001344
41745	Linear peptide	MIMQGGFSV	694	702			Proto-oncogene DBL	P10911.3	Homo sapiens	9606
41748	Linear peptide	MINAYLDKL	523	531			STARP antigen	CAA81224.1	Plasmodium falciparum	5833	Data originally imported from the HLA Ligand Database and recurated.
41919	Linear peptide	MLDLQPETT	12	20			E7 protein	ABL96585.1	Human papillomavirus type 16	333760
42013	Linear peptide	MLNIPSINV	120	128			HCMVUL83	CAA35357.1	Human betaherpesvirus 5	10359
42152	Linear peptide	MMMNWSPTT	322	330			polyprotein	ABV46054.1	Hepatitis C virus genotype 1	41856	The epitope sequence is conserved among HCV genotypes 1a and 1b. The epitope is part of the E1 protein.
42171	Linear peptide	MMRKLAILSV	1	10			circumsporozoite (CS) protein	NP_473175.2	Plasmodium falciparum 3D7	36329
42172	Linear peptide	MMRKLAILSVSSFLFVEALF	1	20			Circumsporozoite protein precursor	P19597.2	Plasmodium falciparum 3D7	36329	This HLA-DR restricted peptide contains HLA-A2 restricted epitopes A2.1 and A2.7.
42203	Linear peptide	MNHLGNVKYLVIVFL	1	15			thrombospondin related anonymous protein	AAA29775.1	Plasmodium falciparum 3D7	36329	This peptide was selected for study from a set of 113 15-mers (overlapping by 10 residues) corresponding to the entire sequence of SSP2 (a.k.a TRAP) since it conforms to the HLA-A2 binding motif.
43619	Linear peptide	NEGCGWAGW	88	96			structural protein	BAA00705.1	Hepatitis C virus	11103
44727	Linear peptide	NLGKVIDTLTCGFADLMGYIPLVGA	118	142			structural protein	BAA00705.1	Hepatitis C virus	11103
44802	Linear peptide	NLLVTGFDT	260	268			PE-PGRS family protein	ZP_02552202.1	Mycobacterium tuberculosis	1773
44814	Linear peptide	NLNESLIDL	1174	1182			S protein	ABF65836.1	SARS coronavirus	227859
44920	Linear peptide	NLVPMVATV	485	493			pp65	AAA45994.1	Human betaherpesvirus 5	10359
45001	Linear peptide	NMLSTVLGV	413	421			PB1 polymerase subunit	AAA43637.1	Influenza A virus	11320
45018	Linear peptide	NMPNDPNRNV	284	293			Circumsporozoite protein precursor	P19597.2	Plasmodium falciparum NF54	5843
47793	Linear peptide	PGYPWPLYGNEGCGWAGWLLSPRGS	79	103			structural protein	BAA00705.1	Hepatitis C virus	11103
48951	Linear peptide	PPWQAGILARNLVPMVATVQGQN	485	507			HCMVUL83	CAA35357.1	Human betaherpesvirus 5	10359
49330	Linear peptide	PSDKHIKEYLNKIQNSLSTE	311	330			Circumsporozoite protein precursor	P19597.2	Plasmodium falciparum	5833
50527	Linear peptide	QDVKFPGGGQIVGGVYLLPRRGPRL	20	44			structural protein	BAA00705.1	Hepatitis C virus	11103
50882	Linear peptide	QGHNMPNDPNRNVDENANANSAVKN	281	305			Circumsporozoite protein precursor	P19597.2	Plasmodium falciparum 3D7	36329	This HLA-DR restricted peptide contains HLA-B7 restricted epitope B7.285.
51342	Linear peptide	QLFNHTMFI	478	486			Myosin-9	P35579.4	Homo sapiens	9606
51436	Linear peptide	QLLSSSKYT	16	24			Nucleoprotein	P03418.1	Human respiratory syncytial virus A strain Long	11260
51604	Linear peptide	QMDYSNGLFV	610	619			FL-160-2 protein - Trypanosoma cruzi	JH0823	Trypanosoma cruzi	5693
51657	Linear peptide	QMWKCLIRL	1606	1614			polyprotein	ABV46054.1	Hepatitis C virus genotype 1	41856	The epitope sequence is conserved among HCV genotypes 1a and 1b. The epitope is part of the NS3 protein.
53138	Linear peptide	RALAETSYV	269	277			Melanoma-associated antigen 1	P43355.1	Homo sapiens	9606
54520	Linear peptide	RLERKWLDV	210	218			Nucleoprotein	P04851.1	Measles virus strain Edmonston	11235
54680	Linear peptide	RLNEVAKNL	1167	1175			Spike glycoprotein precursor	P59594.1	SARS coronavirus BJ01	228407
54690	Linear peptide	RLNQLESKV	227	235			Nucleoprotein	P59595.1	SARS coronavirus	227859
54704	Linear peptide	RLPLVLPAV	163	171			hydrolase	WP_015628351.1	Mycobacterium tuberculosis	1773
54825	Linear peptide	RLWHYPCTV	614	622			polyprotein	ABV46054.1	Hepatitis C virus genotype 1	41856	The epitope sequence is conserved among HCV genotypes 1a and 1b. The epitope is part of the E2 protein.
54949	Linear peptide	RMSKGVFKV	1520	1528			polymerase protein	ABY21184.1	Measles virus	11234
56343	Linear peptide	RVLEDGVNYA	156	165			structural protein	BAA00705.1	Hepatitis C virus	11103
57790	Linear peptide	SFHSLHLLF	301	309			transcriptional activator Tax	AAG31572.1	Human T-lymphotropic virus 1	11908
58721	Linear peptide	SITEVECFL	36	44			VP1	AAL37677.1	JC polyomavirus	10632	Sequence of epitope is found in reference Du Pasquier et al. [PMID: 14561528].
58730	Linear peptide	SIVAYTMSL	673	681			S protein	ABF65836.1	SARS coronavirus	227859
59132	Linear peptide	SLGGLLTMV	307	315			latent membrane protein 2A	ADK56631.1	Human gammaherpesvirus 4	10376	The sequence of this epitope was obtained from a clinical isolate and is not available in GenBank or SwissProt.
59154	Linear peptide	SLHTGFLASL	432	441			polyprotein	AAP55688.1	Hepatitis C virus subtype 2a	31649
59219	Linear peptide	SLKKNSRSL	64	72			Circumsporozoite protein precursor	P02893.1	Plasmodium falciparum 7G8	57266	Data originally imported from the HLA Ligand Database and recurated.
59411	Linear peptide	SLQEEIAFL	226	234			Vimentin	P08670.4	Homo sapiens	9606
59551	Linear peptide	SLVIVTTFV	225	233			Glycoprotein GP85 precursor	P03231.1	Human herpesvirus 4 (strain B95-8)	10377
59594	Linear peptide	SLYFGGICV					Phosphate transport system permease protein PstA 1	SRC280197	Mycobacterium tuberculosis	1773
59613	Linear peptide	SLYNTVATL	77	85			gag polyprotein	BAB19175.1	Human immunodeficiency virus 1	11676
59722	Linear peptide	SMNATLVQA	47	55			FL-160-2 protein - Trypanosoma cruzi	JH0823	Trypanosoma cruzi	5693
59766	Linear peptide	SMVGNWAKV	363	371			polyprotein	ABV46054.1	Hepatitis C virus genotype 1	41856	The epitope sequence is conserved among HCV genotypes 1a and 1b. The epitope is part of the E1 protein.
60867	Linear peptide	SRYWAIRTR	383	391			Nucleoprotein	SRC124	Influenza A virus (A/Puerto Rico/8/1934(H1N1))	211044
61445	Linear peptide	SSVFNVVNSSIGLIMVLSFLFLN	375	397			Circumsporozoite protein precursor	P19597.2	Plasmodium falciparum 3D7	36329	This HLA-DR restricted peptide contains HLA-A2 restricted epitope A2.386.
62305	Linear peptide	SVRDRLARL	596	604			EBNA3A nuclear protein	Q8AZJ8	Human gammaherpesvirus 4	10376
62404	Linear peptide	SVYDFFVWL	180	188			tyrosinase-related protein-2	CAA04137.1	Homo sapiens	9606
64320	Linear peptide	TIHDIILECV	29	38			Protein E6	P03126.1	Human papillomavirus type 16	333760
64412	Linear peptide	TIPEALAAV	6	14			PE_PGRS 33	AAU10330.1	Mycobacterium tuberculosis	1773
64714	Linear peptide	TLAGKGISVV	86	95			MPT51/MPB51 antigen precursor	P0A4V6.1	Mycobacterium tuberculosis	1773
64763	Linear peptide	TLDYKPLSV	208	216			Early antigen protein D	P03191.1	Human herpesvirus 4 (strain B95-8)	10377
64772	Linear peptide	TLEGFASPL	343	351			tyrosinase	GI:12656248	Homo sapiens	9606
64794	Linear peptide	TLFIGSHVV	420	428			Glycoprotein GP85 precursor	P03231.1	Human herpesvirus 4 (strain B95-8)	10377
64808	Linear peptide	TLGEEDKDLDEPEQF	551	565			thrombospondin related anonymous protein	AAA29775.1	Plasmodium falciparum 3D7	36329	This peptide was selected for study from a set of 113 15-mers (overlapping by 10 residues) corresponding to the entire sequence of SSP2 (a.k.a TRAP) since it conforms to the HLA-A2 binding motif.
64818	Linear peptide	TLGIVCPI	86	93			E7 protein	ABL96585.1	Human papillomavirus type 16	333760
64830	Linear peptide	TLHEYMLDL	7	15			E7 protein	ABL96585.1	Human papillomavirus type 16	333760
64893	Linear peptide	TLLANVTAV	341	349			VP6 protein	P03530.1	Human rotavirus strain WA	10962
64942	Linear peptide	TLLVDLLWL	166	174			Latent membrane protein 1	P03230.1	Human gammaherpesvirus 4	10376
64950	Linear peptide	TLLYVLFEV	914	922			Hexon protein	P04133.3	Human adenovirus 5	28285	This conserved sequence is present in HAdV species A: 31 and C: 1, 2, 5.
65043	Linear peptide	TLRKPKHKKL	104	113			Circumsporozoite protein precursor	P13814.1	Plasmodium falciparum NF54	5843	Data originally imported from the HLA Ligand Database and recurated.
65367	Linear peptide	TNLTDALLQVRKHLN	131	145			thrombospondin related anonymous protein	AAA29775.1	Plasmodium falciparum 3D7	36329	This peptide was selected for study from a set of 113 15-mers (overlapping by 10 residues) corresponding to the entire sequence of SSP2 (a.k.a TRAP) since it conforms to the HLA-A2 binding motif.
65748	Linear peptide	TPRVTGGGAM	417	426			tegument protein pp65	YP_002608275.1	Human betaherpesvirus 5	10359
69370	Linear peptide	VLAGLLGNV					Circumsporozoite-related antigen	SRC280086	Plasmodium falciparum	5833	Imported from the TopBank database (internal database of LIAI) and recurated.
69420	Linear peptide	VLDKVEETV	982	990			Liver stage antigen-3 precursor	Q9U0P0	Plasmodium falciparum	5833
69452	Linear peptide	VLEETSVML	316	324			UL123; IE1	AAR31448.1	Human betaherpesvirus 5	10359
69512	Linear peptide	VLGPISGHV	14	22			phosphorylated matrix protein (pp65)	AAA45996.1	Human betaherpesvirus 5	10359
69598	Linear peptide	VLLGGVGLVL	91	100			Malaria protein EXP-1 precursor	P04926.2	Plasmodium falciparum	5833	Imported from the TopBank database (internal database of LIAI) and recurated.
69646	Linear peptide	VLMGGVPGVE	158	167			Alanine dehydrogenase	P30234.2	Mycobacterium tuberculosis	1773
69649	Linear peptide	VLMIKALEL	741	749			Myosin-9	P35579.4	Homo sapiens	9606
69657	Linear peptide	VLNDILSRL	958	966			S protein	ABF65836.1	SARS coronavirus	227859
69798	Linear peptide	VLTDGNPPEV	88	97			lipoprotein	NP_338420.1	Mycobacterium tuberculosis	1773
71616	Linear peptide	VVCMYLYQLSPPITW	151	165			transcriptional activator Tax	AAG31572.1	Human T-lymphotropic virus 1	11908
71734	Linear peptide	VVLDSLDPMV	2251	2260			polyprotein	AAF01178.1	Hepatitis C virus subtype 2a	31649
72865	Linear peptide	WMNRLIAFA	1915	1923			polyprotein	ABV46054.1	Hepatitis C virus genotype 1	41856	The epitope sequence is conserved among HCV genotypes 1a and 1b. The epitope is part of the NS4b protein.
74289	Linear peptide	YILEETSVLL	315	324			UL123; IE1	AAR31504.1	Human betaherpesvirus 5	10359
74290	Linear peptide	YILEETSVLM					55 kDa immediate-early protein 1	SRC265905	Human betaherpesvirus 5	10359	This structure is a natural variant of the human CMV intermediate-early protein 1 residues 315-324.
74291	Linear peptide	YILEETSVM	315	323			UL123; IE1	AAR31419.1	Human betaherpesvirus 5	10359
74292	Linear peptide	YILEETSVML	315	324			UL123; IE1	AAR31390.1	Human herpesvirus 5 strain Towne	10363
74293	Linear peptide	YILEETSVMM					55 kDa immediate-early protein 1	SRC265905	Human betaherpesvirus 5	10359	This structure is a natural variant of the human CMV intermediate-early protein 1 residues 315-324.
74296	Linear peptide	YILGADPLRV	354	363			55 kDa immediate-early protein 1	P13202.1	Human herpesvirus 5 strain AD169	10360
74407	Linear peptide	YIVRWEWVV	717	725			polyprotein	AAU89634.1	Hepatitis C virus subtype 2a	31649
74638	Linear peptide	YLEPGPVTA	280	288			melanoma antigen gp100	AAB31176.1	Homo sapiens	9606
74703	Linear peptide	YLIIGILTL	2242	2250			Genome polyprotein	P03314.1	Yellow fever virus 17D	11090
74774	Linear peptide	YLLEMLWRL	125	133			Latent membrane protein 1	P03230.1	Human gammaherpesvirus 4	10376
74787	Linear peptide	YLLKPVQRI	627	635			Proto-oncogene DBL	P10911.3	Homo sapiens	9606
74798	Linear peptide	YLLPRRGPRL	35	44			structural protein	BAA00705.1	Hepatitis C virus	11103
74841	Linear peptide	YLNKIQNSL	319	327			Circumsporozoite protein precursor	P19597.2	Plasmodium falciparum 3D7	36329
74886	Linear peptide	YLQQNWWTL	159	167			latent membrane protein 1	AAS99606.1	Human gammaherpesvirus 4	10376
74961	Linear peptide	YLVAYQATV	1585	1593			polyprotein	ABV46054.1	Hepatitis C virus genotype 1	41856	The epitope sequence is conserved among HCV genotypes 1a and 1b. The epitope is part of the NS3 protein.
75074	Linear peptide	YMLDLQPET	11	19			E7 protein	ABL96585.1	Human papillomavirus type 16	333760
75075	Linear peptide	YMLDLQPETT	11	20			E7	AAD33253.1	Human papillomavirus type 16	333760
76333	Linear peptide	YVLDHLIVV	109	117			Transcription activator BRLF1	P03209.1	Human herpesvirus 4 (strain B95-8)	10377
76336	Linear peptide	YVLEETSVLL					55 kDa immediate-early protein 1	SRC265905	Human betaherpesvirus 5	10359	This structure is a natural variant of the human CMV intermediate-early protein 1 residues 315-324.
76338	Linear peptide	YVLEETSVML	315	324			55 kDa immediate-early protein 1	P13202.1	Human herpesvirus 5 strain AD169	10360
76342	Linear peptide	YVLFEVFDVV	917	926			Hexon protein	P04133.3	Human adenovirus 5	28285
95281	Linear peptide	CISGVCWTV
97314	Linear peptide	FVANFSMEL	501	509			RNA-directed RNA polymerase subunit P1 (Polymerase basic protein 1) (PB1)	P03431.1	Influenza A virus (A/Puerto Rico/8/1934(H1N1))	211044
97338	Linear peptide	GIDPNIRTGV	1273	1282			polyprotein	ABV46054.1	Hepatitis C virus genotype 1	41856	The epitope sequence is conserved among HCV genotypes 1a and 1b. The epitope is part of the NS3 protein.
100725	Linear peptide	ALWMRLLPL	2	10			Insulin precursor	P01308.1	Homo sapiens	9606
100920	Linear peptide	HLVEALYLV	10	18			Chain B, Structure Of Insulin	1XDA_B	Homo sapiens	9606
102899	Linear peptide	VIVMLTPLV	805	813			protein tyrosine phosphatase, receptor type, N precursor	NP_002837.1	Homo sapiens	9606
102908	Linear peptide	VMNILLQYVV	114	123			Glutamate decarboxylase 2	Q05329.1	Homo sapiens	9606
103041	Linear peptide	ALWGPDPAAA	15	24			Insulin precursor	P01308.1	Homo sapiens	9606
103368	Linear peptide	LNIDLLWSV	228	236			islet-specific glucose-6-phosphatase-related protein isoform 1	NP_066999.1	Homo sapiens	9606
103557	Linear peptide	RLLPLLALL	6	14			proinsulin precursor	NP_000198.1	Homo sapiens	9606
103705	Linear peptide	VLFGLGFAI	265	273			islet-specific glucose-6-phosphatase-related protein isoform 1	NP_066999.1	Homo sapiens	9606
104336	Linear peptide	VMNILLQYV	114	122			Glutamate decarboxylase 2	Q05329.1	Homo sapiens	9606
106609	Linear peptide	LLDVAPLSL	393	401			Heat shock 70 kDa protein 1	P08107.5	Homo sapiens	9606
106610	Linear peptide	LLLLDVAPL	391	399			Heat shock 70 kDa protein 1	P08107.5	Homo sapiens	9606
106611	Linear peptide	LMGDKSENV	380	388			Heat shock 70 kDa protein 1	P08107.5	Homo sapiens	9606
110225	Linear peptide	FQQLFLNTL	86	94			Protein E7	P06788.2	Human papillomavirus type 18	333761
110318	Linear peptide	LFLNTLSFVCPWCASQQ	89	105			Protein E7	P06788.2	Human papillomavirus type 18	333761
110325	Linear peptide	LLNYILKSV	18	26			Glycoprotein VP7 (Serotype-specific antigen) (Outer shell glycoprotein)	P03532.1	Human rotavirus strain WA	10962
110371	Linear peptide	PQRHTMLCMCCKCEARIKLV	56	75			Protein E7	P06788.2	Human papillomavirus type 18	333761
110420	Linear peptide	SEEENDEIDGVNHQHLPARR	34	53			Protein E7	P06788.2	Human papillomavirus type 18	333761
110440	Linear peptide	TLQDIVLHL	7	15			Protein E7	P06788.2	Human papillomavirus type 18	333761
110629	Linear peptide	ICWGNQLFV	349	357			L1 protein	ACG75893.1	Human papillomavirus type 16	333760
111252	Linear peptide	ELTEVFEFA	40	48			Protein E6	P06463.1	Human papillomavirus type 18	333761
111266	Linear peptide	FAFKDLFVV	47	55			Protein E6	P06463.1	Human papillomavirus type 18	333761
111442	Linear peptide	KCIDFYSRI	67	75			Protein E6	P06463.1	Human papillomavirus type 18	333761	This conserved sequence is also present in HPV45 E6 protein.
111465	Linear peptide	KTVLELTEV	36	44			Protein E6	P06463.1	Human papillomavirus type 18	333761
111512	Linear peptide	LQDIEITCV	25	33			Protein E6	P06463.1	Human papillomavirus type 18	333761
121572	Linear peptide	LLWNGPMAV	2470	2478			Genome polyprotein	P03314.1	Yellow fever virus 17D	11090
131311	Linear peptide	SLMSWSAIL	78	86			interferon-inducible peptide precursor	AAC50160.1	Homo sapiens	9606
131878	Linear peptide	FLMLVGGSTL	162	171			Thrombopoietin precursor (Megakaryocyte colony-stimulating factor) (Myeloproliferative leukemia virus oncogene ligand) (C-mpl ligand) (ML) (Megakaryocyte growth and development factor) (MGDF)	P40225.1	Homo sapiens	9606
131978	Linear peptide	MLVGGSTLCV	164	173			Thrombopoietin precursor (Megakaryocyte colony-stimulating factor) (Myeloproliferative leukemia virus oncogene ligand) (C-mpl ligand) (ML) (Megakaryocyte growth and development factor) (MGDF)	P40225.1	Homo sapiens	9606
132029	Linear peptide	QLGPTCLSSL	101	110			Thrombopoietin precursor (Megakaryocyte colony-stimulating factor) (Myeloproliferative leukemia virus oncogene ligand) (C-mpl ligand) (ML) (Megakaryocyte growth and development factor) (MGDF)	P40225.1	Homo sapiens	9606
132064	Linear peptide	SLLGQLSGQV	109	118			Thrombopoietin precursor (Megakaryocyte colony-stimulating factor) (Myeloproliferative leukemia virus oncogene ligand) (C-mpl ligand) (ML) (Megakaryocyte growth and development factor) (MGDF)	P40225.1	Homo sapiens	9606
132098	Linear peptide	TLLLEGVMAA	89	98			Thrombopoietin precursor (Megakaryocyte colony-stimulating factor) (Myeloproliferative leukemia virus oncogene ligand) (C-mpl ligand) (ML) (Megakaryocyte growth and development factor) (MGDF)	P40225.1	Homo sapiens	9606
133716	Linear peptide	TLYAVATTI	2284	2292			polyprotein	ABG75765.1	Dengue virus 1	11053
136142	Linear peptide	AVADHVAAV	134	142			PROBABLE CUTINASE PRECURSOR CFP21	CAA98399.1	Mycobacterium tuberculosis H37Rv	83332
136896	Linear peptide	VLHDDLLEA	137	145			histocompatibility (minor) HA-1	AAH65223.1	Homo sapiens	9606	The epitope sequence is from the reference cited: den Haan et al. (1998) Science 279(5353):1054-1057 [PMID: 9461441].
137402	Linear peptide	FIDSYICQV	311	319			SMCY	AAC50806.1	Homo sapiens	9606
138368	Linear peptide	ELAGWGILTV
138486	Linear peptide	LLAGIGTVPI	178	187			solute carrier organic anion transporter family member 2A1	NP_005621.2	Homo sapiens	9606
138937	Linear peptide	YIGEVLVSV	41	49			myosin-Ig	NP_149043.2	Homo sapiens	9606	The epitope sequence is from the reference cited: den Haan et al. (1995) Science 268(5216): 1476-80 [PMID: 7539551].
139021	Linear peptide	CIPPDSLLFPA					chromosome 19 open reading frame 48	SRC253648	Homo sapiens	9606
140054	Linear peptide	MVWESGCTV	797	805			Receptor-type tyrosine-protein phosphatase-like N precursor	Q16849.1	Homo sapiens	9606
140732	Linear peptide	QLVQSGAEV	3	11			Ig heavy chain V-I region EU	P01742.1	Homo sapiens	9606
141146	Linear peptide	FIFPASKVYL	1468	1477			DFFRY	CAA73940.1	Homo sapiens	9606
141147	Linear peptide	FLLDILGAT	428	436			dead box, Y isoform	AAC51831.1	Homo sapiens	9606
141157	Linear peptide	KLMPPDRTAV	1046	1055			DFFRY	CAA73940.1	Homo sapiens	9606
141166	Linear peptide	LLVSEIDWL	1401	1409			DFFRY	CAA73940.1	Homo sapiens	9606
141172	Linear peptide	RLLIKKLPRV	1785	1794			DFFRY	CAA73940.1	Homo sapiens	9606
144292	Linear peptide	FQGRGVFEL	458	466			nucleoprotein	AAA43467.1	Influenza A virus	11320
144293	Linear peptide	FQVDCFLWHV	9	18			nonstructural protein 1	ABL08591.1	Influenza A virus	11320
144913	Linear peptide	LLYANSAHAL	892	901			Hexon protein	P04133.3	Human adenovirus 5	28285
145860	Linear peptide	KVLIRCYLC	99	107			Protein E6	P04019.1	Human papillomavirus type 11	10580
145918	Linear peptide	NLLIRCLRC	100	108			Protein E6	P06463.1	Human papillomavirus type 18	333761
156671	Linear peptide	GLTVAVAGA	4	12			lipoprotein	WP_015629174.1	Mycobacterium tuberculosis	1773
156691	Linear peptide	ILVAGLSGC	14	22			lipoprotein	WP_015629174.1	Mycobacterium tuberculosis	1773
156699	Linear peptide	KITGTATGV	131	139			lipoprotein	WP_015629174.1	Mycobacterium tuberculosis	1773
156780	Linear peptide	TLDGSLHAV	66	74			endoplasmic reticulum to nucleus signalling 1 isoform 1 variant	BAD93106.1	Homo sapiens	9606
158752	Linear peptide	FIDKFTPPV	133	141			HLA class II histocompatibility antigen, DR alpha chain precursor	NP_061984.2	Homo sapiens	9606
158764	Linear peptide	FLLKLTPLL	327	335			mediator of RNA polymerase II transcription subunit 24 isoform 2	NP_001072986.1	Homo sapiens	9606
158786	Linear peptide	FTWEGLYNV	626	634			ubiquitin specific peptidase 11	AAI40850.1	Homo sapiens	9606
158805	Linear peptide	GPFGPPMPLHV	919	929			phosphatidylinositol-3,4,5-trisphosphate 5-phosphatase 1 isoform a	NP_001017915.1	Homo sapiens	9606
158959	Linear peptide	LLGPTVML	663	670			protein KRI1 homolog	NP_075384.3	Homo sapiens	9606
159059	Linear peptide	QVFPGLLERV	324	333			ataxin-10 isoform 1	NP_037368.1	Homo sapiens	9606
159114	Linear peptide	SLWGGDVVL	29	37			vacuolar protein sorting-associated protein 13B isoform 4	NP_858047.2	Homo sapiens	9606
159218	Linear peptide	YLDLFGDPSV	311	320			farnesyl pyrophosphate synthase isoform a	NP_001995.1	Homo sapiens	9606
163027	Linear peptide	NIQTAINQV	3353	3361			Genome polyprotein	Q9WDA6.1	Dengue virus 2	11060
163620	Linear peptide	TITEEIAVQ	3127	3135			Genome polyprotein	P29990.1	Dengue virus 2 Thailand/16681/84	31634
163859	Linear peptide	VTLLCLIPTV					Genome polyprotein	SRC265914	Dengue virus 2	11060	The epitope was discovered from Dengue virus 2 infected cells. The sequence is not found in the current Dengue virus 2 entries in Genpept/Genbank database.
164547	Linear peptide	RMLGDVMAV	562	570			envelope glycoprotein B	NP_044629.1	Herpes simplex virus (type 1 / strain 17)	10299
164581	Linear peptide	ALAVLSVTL	3	11			Thyroid peroxidase	P07202.4	Homo sapiens	9606
164587	Linear peptide	ALSEDLLSI	118	126			Thyroid peroxidase	P07202.4	Homo sapiens	9606
164764	Linear peptide	GLLDQVAAL	2355	2363			Thyroglobulin	P01266.5	Homo sapiens	9606
164765	Linear peptide	GLREDLLSL	2750	2758			Thyroglobulin	P01266.5	Homo sapiens	9606
165028	Linear peptide	LLIGGFAGL	857	865			Thyroid peroxidase	P07202.4	Homo sapiens	9606
165257	Linear peptide	SLQDVPLAAL	841	850			Thyroglobulin	P01266.5	Homo sapiens	9606
168159	Linear peptide	ALGDLFQSI	221	229			zinc transporter 8 isoform a	NP_776250.2	Homo sapiens	9606
168865	Linear peptide	ILAVDGVLSV	291	300			zinc transporter 8 isoform a	NP_776250.2	Homo sapiens	9606
169149	Linear peptide	LLIDLTSFL	107	115			zinc transporter 8 isoform a	NP_776250.2	Homo sapiens	9606
169790	Linear peptide	SVHSLHIWSL	299	308			zinc transporter 8 isoform a	NP_776250.2	Homo sapiens	9606
170324	Linear peptide	ALLKDTVYT	191	199			proto-oncogene PIM1	AAK70871.1	Homo sapiens	9606
172186	Linear peptide	LLSILCIWV	145	153			zinc transporter 8 isoform a	NP_776250.2	Homo sapiens	9606
172188	Linear peptide	LLSLFSLWL	115	123			zinc transporter 8 isoform a	NP_776250.2	Homo sapiens	9606
172377	Linear peptide	MLLDKNIPI	1	9			DAPK2 protein	AAI14952.1	Homo sapiens	9606
173562	Linear peptide	VAANIVLTV	186	194			zinc transporter 8 isoform a	NP_776250.2	Homo sapiens	9606
174182	Linear peptide	LIASNVAGV	118	126			PPE family protein	ZP_06522986.1	Mycobacterium tuberculosis H37Rv	83332
175795	Linear peptide	FATGIGIITV
177179	Linear peptide	MTIIFLILM	1	9			hemagglutinin	ACV41482.1	Influenza A virus (A/mallard/Quebec/10969/2006(H2N3))	655288
177212	Linear peptide	PVAGGTSSIYI	219	229			Polymerase subunit 2	Q75TA1	Influenza A virus (A/Yokohama/22/2002(H1N2))	255681
177335	Linear peptide	TVIKTNMI	528	535			polymerase PB1	ABR28809.1	Influenza A virus (A/Auckland/590/2000(H1N1))	444793
177367	Linear peptide	YINTALLNA	451	459			polymerase PA	ACA28821.1	Influenza A virus (A/Cygnus olor/Czech Republic/10732/07(H5N1))	504697
177496	Linear peptide	GILGFVTTL
178829	Linear peptide	FLGPLLVLQA	171	180			large/middle/small S proteins	AAK97183.1	Hepatitis B virus	10407
179688	Linear peptide	WLGNIIMYA	2827	2835			polyprotein	AAK08509.1	Hepatitis C virus genotype 1	41856	The epitope sequence is conserved among HCV genotypes 1a and 1b. The epitope is part of the NS5b protein.
179820	Linear peptide	ILAKFLHWL	540	548			Telomerase reverse transcriptase	O14746.1	Homo sapiens	9606
180320	Linear peptide	AMDTISVFL	2130	2138			Genome polyprotein	P03314.1	Yellow fever virus 17D	11090
180348	Linear peptide	VMLFILAGL	2161	2169			Genome polyprotein	P03314.1	Yellow fever virus 17D	11090
180541	Linear peptide	ITLLCLIPTV	102	111			polyprotein	AEX09560.1	Dengue virus 4	11070
180706	Linear peptide	QLLNSVLTL	248	256			uncharacterized protein KIAA1551	NP_060639.3	Homo sapiens	9606
180810	Linear peptide	VTYECPLLV	162	170			polyprotein	ACW82884.1	Dengue virus 4	11070
181261	Linear peptide	AALAGRTCQALVVLS	109	123			nucleocapsid protein	ADC42124.1	Rift Valley fever virus	11588
181267	Linear peptide	ALINKYKLKEGNPSR	85	99			nucleocapsid protein	ADC42124.1	Rift Valley fever virus	11588
181284	Linear peptide	AYQGFDARRVIELLK	29	43			nucleocapsid protein	ADC42124.1	Rift Valley fever virus	11588
181294	Linear peptide	DRNEIEQWVREFAYQ	17	31			nucleocapsid protein	ADC42124.1	Rift Valley fever virus	11588
181295	Linear peptide	DSNGKPSAAVMAAAQ	225	239			nucleocapsid protein	ADC42124.1	Rift Valley fever virus	11588
181314	Linear peptide	FDARRVIELLKQYGG	33	47			nucleocapsid protein	ADC42124.1	Rift Valley fever virus	11588
181338	Linear peptide	HSLYLLQFSRVINPN	169	183			nucleocapsid protein	ADC42124.1	Rift Valley fever virus	11588
181342	Linear peptide	IEQWVREFAYQGFDA	21	35			nucleocapsid protein	ADC42124.1	Rift Valley fever virus	11588
181347	Linear peptide	ILDAHSLYL	165	173			nucleocapsid protein	ADC42124.1	Rift Valley fever virus	11588
181348	Linear peptide	ILDAHSLYLLQFSRV	165	179			nucleocapsid protein	ADC42124.1	Rift Valley fever virus	11588
181359	Linear peptide	KEEVAATFTQPMNAA	189	203			nucleocapsid protein	ADC42124.1	Rift Valley fever virus	11588
181360	Linear peptide	KEGKATVEALINKYK	77	91			nucleocapsid protein	ADC42124.1	Rift Valley fever virus	11588
181361	Linear peptide	KEGNPSRDELTLSRV	93	107			nucleocapsid protein	ADC42124.1	Rift Valley fever virus	11588
181371	Linear peptide	KPSAAVMAAAQAYKT	229	243			nucleocapsid protein	ADC42124.1	Rift Valley fever virus	11588
181373	Linear peptide	KRREFLKAFGLVDSN	213	227			nucleocapsid protein	ADC42124.1	Rift Valley fever virus	11588
181390	Linear peptide	MDNYQELAIQFAAQA	1	15			nucleocapsid protein	ADC42124.1	Rift Valley fever virus	11588
181394	Linear peptide	MKMSKEGKATVEALI	73	87			nucleocapsid protein	ADC42124.1	Rift Valley fever virus	11588
181427	Linear peptide	PSRDELTLSRVAAAL	97	111			nucleocapsid protein	ADC42124.1	Rift Valley fever virus	11588
181429	Linear peptide	QALVVLSEWLPVTGT	117	131			nucleocapsid protein	ADC42124.1	Rift Valley fever virus	11588
181430	Linear peptide	QELAIQFAAQAVDRN	5	19			nucleocapsid protein	ADC42124.1	Rift Valley fever virus	11588
181444	Linear peptide	RGRTKEEVAATFTQP	185	199			nucleocapsid protein	ADC42124.1	Rift Valley fever virus	11588
181464	Linear peptide	SRVINPNLRGRTKEE	177	191			nucleocapsid protein	ADC42124.1	Rift Valley fever virus	11588
181500	Linear peptide	VLSEWLPVT	121	129			nucleocapsid protein	ADC42124.1	Rift Valley fever virus	11588
181501	Linear peptide	VLSEWLPVTGTTMDG	121	135			nucleocapsid protein	ADC42124.1	Rift Valley fever virus	11588
181517	Linear peptide	YLRAILDAHSLYLLQ	161	175			nucleocapsid protein	ADC42124.1	Rift Valley fever virus	11588
181981	Linear peptide	AIMEKNIVL	94	102			nonstructural protein 1	ADO33214.1	Influenza A virus (A/California/07/2009(H1N1))	641809
181982	Linear peptide	AVMEKNIVL	122	130			nonstructural protein 1	AEK85784.1	Influenza A virus (A/Netherlands/602/2009(H1N1))	643212
182562	Linear peptide	ALPVYLMTL	1329	1337			polyprotein	ACJ04171.1	Dengue virus 4	11070
182563	Linear peptide	ALSEGVYRI	1491	1499			polyprotein	ACJ04171.1	Dengue virus 4	11070
183407	Linear peptide	GLFGKTQVGV	1503	1512			polyprotein	ACJ04171.1	Dengue virus 4	11070
184065	Linear peptide	KLNDWDFVV	399	407			Nonstructural protein NS3	YP_001531172.2	Dengue virus 3	11069
184079	Linear peptide	KLTDWDFVV	398	406			NS3 protein	NP_740321.1	Dengue virus 4	11070
186127	Linear peptide	TTWEDVPYL	3321	3329			polyprotein	AAW51410.2	Dengue virus 3	11069
186284	Linear peptide	VLDDGIYRI	1492	1500			polyprotein	ABG75765.1	Dengue virus 1	11053
193665	Linear peptide	ALLGLTLGV	17	25			envelope glycoprotein B	NP_044629.1	Herpes simplex virus (type 1 / strain 17)	10299
193756	Linear peptide	FLDPRPLTV	190	198			cytochrome P450	AAA19567.1	Homo sapiens	9606
193837	Linear peptide	FVLATGDFV	287	295			envelope glycoprotein B	NP_044629.1	Herpes simplex virus (type 1 / strain 17)	10299
193840	Linear peptide	GIFEDRAPV	184	192			envelope glycoprotein B	NP_044629.1	Herpes simplex virus (type 1 / strain 17)	10299
194040	Linear peptide	KLFEKVKEV	63	71			fatty acyl-CoA reductase 2 isoform 1	NP_060569.3	Homo sapiens	9606
194141	Linear peptide	LLAPRPVAV	103	111			Cyclin-dependent kinase inhibitor 1C	P49918.1	Homo sapiens	9606
194227	Linear peptide	NLLTTPKFT	343	351			envelope glycoprotein B	NP_044629.1	Herpes simplex virus (type 1 / strain 17)	10299
194440	Linear peptide	TMYYKDVTV	162	170			envelope glycoprotein B	NP_044629.1	Herpes simplex virus (type 1 / strain 17)	10299
194567	Linear peptide	YLANGGFLI	442	450			envelope glycoprotein B	NP_044629.1	Herpes simplex virus (type 1 / strain 17)	10299
226326	Linear peptide	AKKLHFSTA	173	181			tegument protein VP22	NP_044519.1	Human alphaherpesvirus 2	10310
226340	Linear peptide	FASPADPKV	242	250			VP13/14	ABS84906.1	Human alphaherpesvirus 2	10310
226342	Linear peptide	FVLVILARL	428	436			Vmw63(ICP27)	BAA01269.1	Human alphaherpesvirus 2	10310
226396	Linear peptide	TLVAHGPSL	314	322			Vmw63(ICP27)	BAA01269.1	Human alphaherpesvirus 2	10310
226561	Linear peptide	AAGNVNIAI	70	78			lipoprotein	WP_015629174.1	Mycobacterium tuberculosis	1773
226562	Linear peptide	AAMAAQLQA	81	89			LOW MOLECULAR WEIGHT T-CELL ANTIGEN TB8.4 (Hypothetical protein)	O50430	Mycobacterium tuberculosis	1773
226563	Linear peptide	AAMASASLV	21	29			Alanine and proline-rich secreted protein apa precursor	Q50906.1	Mycobacterium tuberculosis	1773
226565	Linear peptide	AAQFNASPV	56	64			LOW MOLECULAR WEIGHT T-CELL ANTIGEN TB8.4 (Hypothetical protein)	O50430	Mycobacterium tuberculosis	1773
226570	Linear peptide	ALNATDPGA	47	55			LOW MOLECULAR WEIGHT T-CELL ANTIGEN TB8.4 (Hypothetical protein)	O50430	Mycobacterium tuberculosis	1773
226571	Linear peptide	ALSAGVGAV	7	15			LOW MOLECULAR WEIGHT T-CELL ANTIGEN TB8.4 (Hypothetical protein)	O50430	Mycobacterium tuberculosis	1773
226572	Linear peptide	AMAAQLQAV	82	90			LOW MOLECULAR WEIGHT T-CELL ANTIGEN TB8.4 (Hypothetical protein)	O50430	Mycobacterium tuberculosis	1773
226573	Linear peptide	AMASASLVT	22	30			Alanine and proline-rich secreted protein apa precursor	Q50906.1	Mycobacterium tuberculosis	1773
226577	Linear peptide	APPPQRAAM	75	83			LOW MOLECULAR WEIGHT T-CELL ANTIGEN TB8.4 (Hypothetical protein)	O50430	Mycobacterium tuberculosis	1773
226580	Linear peptide	AQFNASPVA	57	65			LOW MOLECULAR WEIGHT T-CELL ANTIGEN TB8.4 (Hypothetical protein)	O50430	Mycobacterium tuberculosis	1773
226581	Linear peptide	AQLQAVPGA	85	93			LOW MOLECULAR WEIGHT T-CELL ANTIGEN TB8.4 (Hypothetical protein)	O50430	Mycobacterium tuberculosis	1773
226582	Linear peptide	AQSYLRNFL	65	73			LOW MOLECULAR WEIGHT T-CELL ANTIGEN TB8.4 (Hypothetical protein)	O50430	Mycobacterium tuberculosis	1773
226583	Linear peptide	ASPPSTAAA	52	60			Alanine and proline-rich secreted protein apa precursor	Q50906.1	Mycobacterium tuberculosis	1773
226593	Linear peptide	GAAQYIGLV	92	100			LOW MOLECULAR WEIGHT T-CELL ANTIGEN TB8.4 (Hypothetical protein)	O50430	Mycobacterium tuberculosis	1773
226594	Linear peptide	GAASGPKVV	45	53			lipoprotein	WP_015629174.1	Mycobacterium tuberculosis	1773
226597	Linear peptide	GLGNVNGVT	101	109			lipoprotein	WP_015629174.1	Mycobacterium tuberculosis	1773
226607	Linear peptide	GWVESDAAH	127	135			Alanine and proline-rich secreted protein apa precursor	Q50906.1	Mycobacterium tuberculosis	1773
226608	Linear peptide	GYTSGTGQG	111	119			lipoprotein	WP_015629174.1	Mycobacterium tuberculosis	1773
226620	Linear peptide	ILLLSLNPV					NADH dehydrogenase 4	SRC282546	Homo sapiens	9606
226626	Linear peptide	LAAPPPQRA	73	81			LOW MOLECULAR WEIGHT T-CELL ANTIGEN TB8.4 (Hypothetical protein)	O50430	Mycobacterium tuberculosis	1773
226627	Linear peptide	LAESIRPLV	279	287			Alanine and proline-rich secreted protein apa precursor	Q50906.1	Mycobacterium tuberculosis	1773
226628	Linear peptide	LAIAAMASA	18	26			Alanine and proline-rich secreted protein apa precursor	Q50906.1	Mycobacterium tuberculosis	1773
226638	Linear peptide	LLMPTISLI					NADH dehydrogenase 4	SRC282546	Homo sapiens	9606
226640	Linear peptide	LTDGNPPEV	89	97			lipoprotein	WP_015629174.1	Mycobacterium tuberculosis	1773
226642	Linear peptide	MASASLVTV	23	31			Alanine and proline-rich secreted protein apa precursor	Q50906.1	Mycobacterium tuberculosis	1773
226643	Linear peptide	MLTTLILTL					NADH dehydrogenase 4	SRC282546	Homo sapiens	9606
226645	Linear peptide	MSLTVGAGV	17	25			LOW MOLECULAR WEIGHT T-CELL ANTIGEN TB8.4 (Hypothetical protein)	O50430	Mycobacterium tuberculosis	1773
226646	Linear peptide	NAPPPPVIA	96	104			Alanine and proline-rich secreted protein apa precursor	Q50906.1	Mycobacterium tuberculosis	1773
226648	Linear peptide	PLLIPTSKL					ATP synthase 6	SRC282545	Homo sapiens	9606
226650	Linear peptide	PNAPPPPVI	95	103			Alanine and proline-rich secreted protein apa precursor	Q50906.1	Mycobacterium tuberculosis	1773
226664	Linear peptide	RLDQKLYAS	169	177			Alanine and proline-rich secreted protein apa precursor	Q50906.1	Mycobacterium tuberculosis	1773
226665	Linear peptide	RLSLTALSA	2	10			LOW MOLECULAR WEIGHT T-CELL ANTIGEN TB8.4 (Hypothetical protein)	O50430	Mycobacterium tuberculosis	1773
226667	Linear peptide	SASLVTVAV	25	33			Alanine and proline-rich secreted protein apa precursor	Q50906.1	Mycobacterium tuberculosis	1773
226673	Linear peptide	SLNPWPPCL					NADH dehydrogenase 4	SRC282546	Homo sapiens	9606
226676	Linear peptide	SLTALSAGV	4	12			LOW MOLECULAR WEIGHT T-CELL ANTIGEN TB8.4 (Hypothetical protein)	O50430	Mycobacterium tuberculosis	1773
226685	Linear peptide	TTGDPPFPG	146	154			Alanine and proline-rich secreted protein apa precursor	Q50906.1	Mycobacterium tuberculosis	1773
226687	Linear peptide	VAPPPPAAA	68	76			Alanine and proline-rich secreted protein apa precursor	Q50906.1	Mycobacterium tuberculosis	1773
226691	Linear peptide	VTGSVVCTT	61	69			lipoprotein	WP_015629174.1	Mycobacterium tuberculosis	1773
226692	Linear peptide	VTLGYTSGT	108	116			lipoprotein	WP_015629174.1	Mycobacterium tuberculosis	1773
226693	Linear peptide	WLGTANNPV	263	271			Alanine and proline-rich secreted protein apa precursor	Q50906.1	Mycobacterium tuberculosis	1773
226695	Linear peptide	YLFTLLVPL	94	102			PTS glucose transporter subunit IIA	KDE51647.1	Bacillus pumilus	1408
226696	Linear peptide	YLRNFLAAP	68	76			LOW MOLECULAR WEIGHT T-CELL ANTIGEN TB8.4 (Hypothetical protein)	O50430	Mycobacterium tuberculosis	1773
226698	Linear peptide	YMPYPGTRI	197	205			Alanine and proline-rich secreted protein apa precursor	Q50906.1	Mycobacterium tuberculosis	1773
226700	Linear peptide	YVFTLLVPL					ATP synthase 6	SRC282545	Homo sapiens	9606
226701	Linear peptide	YVFTLLVSL	212	220			ATP synthase F0 subunit 6	ACR09196.1	Homo sapiens	9606
226770	Linear peptide	FLMSSWWPNL	1135	1144			Histone demethylase UTY	O14607.2	Homo sapiens	9606
226778	Linear peptide	KLCKVRKITV	122	131			ribosomal protein S4, Y-linked 1, isoform CRA_a	EAX02770.1	Homo sapiens	9606
226782	Linear peptide	LLLHCPSKTV	1321	1330			DFFRY	CAA73940.1	Homo sapiens	9606
226790	Linear peptide	NLLDSLEQYI	1751	1760			DFFRY	CAA73940.1	Homo sapiens	9606
226805	Linear peptide	VLLRHSKNV	2077	2085			DFFRY	CAA73940.1	Homo sapiens	9606
226806	Linear peptide	VLTSESMHV	135	143			zinc finger Y-chromosomal protein isoform 1	NP_003402.2	Homo sapiens	9606
226807	Linear peptide	VVPEDYWGV	1115	1123			Histone demethylase UTY	O14607.2	Homo sapiens	9606
226808	Linear peptide	WLDEVKQAL	917	925			SMCY	AAC50806.1	Homo sapiens	9606
227919	Linear peptide	FLKQQYMNL	652	660			polymerase	AFH87851.1	Hepatitis B virus	10407	The authors provided accession I0DE20; however this identifier was not found in NCBI.
227923	Linear peptide	GGPNLDNIL	364	372			Surface protein	Q8QSF2	Hepatitis B virus	10407
227924	Linear peptide	ILRSFIPLL	208	216			S protein	Q6WYY8	Hepatitis B virus	10407
227927	Linear peptide	LTFGRETVLEN	72	82			Precore/core protein	Q6UFV9	Hepatitis B virus	10407
227928	Linear peptide	LTTVPAASLLA	130	140			Surface protein	Q9YKJ7	Hepatitis B virus	10407
229905	Linear peptide	IMAKNEVFCV	2558	2567			polyprotein	ABV46054.1	Hepatitis C virus genotype 1	41856	The epitope sequence is conserved among HCV genotypes 1a and 1b. The epitope is part of the NS5b protein.
229918	Linear peptide	MLVCGDDLV	2733	2741			polyprotein	ABV46054.1	Hepatitis C virus genotype 1	41856	The epitope sequence is conserved among HCV genotypes 1a and 1b. The epitope is part of the NS5b protein.
229935	Linear peptide	SVIDCNTCV	1450	1458			polyprotein	ABV46054.1	Hepatitis C virus genotype 1	41856	The epitope sequence is conserved among HCV genotypes 1a and 1b. The epitope is part of the NS3 protein.
229947	Linear peptide	YLFNWAVRT	2944	2952			polyprotein	ABV46054.1	Hepatitis C virus genotype 1	41856	The epitope sequence is conserved among HCV genotypes 1a and 1b. The epitope is part of the NS5b protein.
229948	Linear peptide	YVGDLCGSV	276	284			polyprotein	ABV46054.1	Hepatitis C virus genotype 1	41856	The epitope sequence is conserved among HCV genotypes 1a and 1b. The epitope is part of the E1 protein.
236774	Linear peptide	AVGLVLPAKL	14	23			dehydrogenase/reductase member 3	ABD90534.1	Homo sapiens	9606
236808	Linear peptide	DIELQAENI	2231	2239			fibrocystin L	AAO60072.1	Homo sapiens	9606
236916	Linear peptide	FLDPDIGGVAV	657	667			TET2 protein	AAI10511.2	Homo sapiens	9606
236917	Linear peptide	FLKDLVASV	70	78			Dr1-associated corepressor	AAB02192.1	Homo sapiens	9606
236918	Linear peptide	FMYDRPLRL	1393	1401			COL6A3 protein	AAI44596.1	Homo sapiens	9606
236991	Linear peptide	GVIDGHIYAV	39	48			KEAP1 protein	AAH21957.2	Homo sapiens	9606
237083	Linear peptide	KIASQLSKL	6469	6477			fibrous sheath-interacting protein 2	NP_775922.2	Homo sapiens	9606
237088	Linear peptide	KLDNQVSKV	355	363			SSX2IP protein	AAH64389.1	Homo sapiens	9606
237134	Linear peptide	LIYSVGLLLA	540	549			solute carrier family 24 (sodium/potassium/calcium exchanger), member 3, isoform CRA_b	EAX10220.1	Homo sapiens	9606
237188	Linear peptide	LTLGEFLKL	96	104			Baculoviral IAP repeat-containing protein 5	O15392.3	Homo sapiens	9606
237196	Linear peptide	MIFRSGSLI	94	102			solute carrier family 35, member B4 variant	BAD96594.1	Homo sapiens	9606
237250	Linear peptide	NVSSRFEEEI	202	211			EF-hand domain-containing protein D2	NP_077305.2	Homo sapiens	9606
237357	Linear peptide	SIEPAKETTTNV	278	289			solute carrier family 2 (facilitated glucose transporter), member 3 variant	BAD92844.1	Homo sapiens	9606
237443	Linear peptide	TLGEFLKL	97	104			Baculoviral IAP repeat-containing protein 5	O15392.3	Homo sapiens	9606
237482	Linear peptide	TVIYRIQAL	9	17			Protein S	BAC54135.1	Homo sapiens	9606
237523	Linear peptide	VLFGGKVSGA	83	92			major facilitator superfamily domain-containing protein 2B	NP_001073942.1	Homo sapiens	9606
237527	Linear peptide	VLYENALKL	328	336			formin homology 2 domain containing 1, isoform CRA_b	EAW83110.1	Homo sapiens	9606
237529	Linear peptide	VMLDVPIRL	848	856			RASAL2 protein	AAI10612.1	Homo sapiens	9606
240082	Linear peptide	MVLALITFL	24	32			polyprotein	AGO46905.1	Dengue virus 1	11053
419259	Linear peptide	LQTGIHVRV	32	40			pp65	AAA45994.1	Human betaherpesvirus 5	10359
504015	Linear peptide	LLIDLTSFLL	107	116			zinc transporter 8 isoform a	NP_776250.2	Homo sapiens	9606
504101	Linear peptide	FILPVLGAV	655	663			Cadherin-3	P22223.2	Homo sapiens	9606
549109	Linear peptide	DLILELLDL	55	63			trichohyalin	NP_009044.2	Homo sapiens	9606
549152	Linear peptide	FLLFIFKVA	74	82			trichohyalin	NP_009044.2	Homo sapiens	9606
549168	Linear peptide	KLQQKEEQL	965	973			trichohyalin	NP_009044.2	Homo sapiens	9606
549180	Linear peptide	KTVDLILEL	52	60			trichohyalin	NP_009044.2	Homo sapiens	9606
549187	Linear peptide	LLQEEEEEL	905	913			trichohyalin	NP_009044.2	Homo sapiens	9606
549203	Linear peptide	NLLEREFGA	35	43			trichohyalin	NP_009044.2	Homo sapiens	9606
549259	Linear peptide	VLRKEEEKL	252	260			trichohyalin	NP_009044.2	Homo sapiens	9606
558268	Linear peptide	ILHTNMPNV	122	130			pIIIpenton protein	CAO78633.1	Human adenovirus 31	10529	This conserved sequence is present in HAdV species A: 31 and C: 1, 2, 5.
566297	Linear peptide	IMPGQEAGL	592	600			melanocyte-specific secreted glycoprotein, partial	GI:386754	Homo sapiens	9606
566537	Linear peptide	VIMPCSWWV	319	327			Leukocyte cell-derived chemotaxin 1	O75829.1	Homo sapiens	9606	The epitope sequence is found in Thiel U. et al., Br J Cancer. 2011 Mar 15;104(6):948-56 [PMID:21407224].
